Perturbation of amygdala-cortical projections reduces ensemble coherence of palatability coding in gustatory cortex

Jian-You Lin<sup>1,2</sup>, Narendra Mukherjee<sup>2</sup>, Max J. Bernstein<sup>1,2</sup>, Donald B. Katz<sup>1,2</sup>  
<sup>1</sup>Department of Psychology, <sup>2</sup>The Volen National Center for Complex Systems  
Brandeis University, Waltham, MA, USA.

Correspondence: Donald B. Katz  
Department of Psychology/Neuroscience Program  
Brandeis University  
415 South Street  
Waltham, MA 02453  
E-mail: dbkatz@brandeis.edu

## ABSTRACT

Taste palatability is centrally involved in consumption decisions—we ingest foods that taste good and reject those that don't. Gustatory cortex (GC) and basolateral amygdala (BLA) almost certainly work together to mediate palatability-driven behavior, but the precise nature of their interplay during taste decision-making is still unknown. To probe this issue, we discretely perturbed (with optogenetics) activity in BLA→GC axons during taste deliveries. This perturbation strongly altered GC taste responses, but while the perturbation itself was tonic (2s), the alterations were not—changes preferentially aligned with the onset times of previously-described taste response epochs, and reduced evidence of palatability-related activity in the "late-epoch" of the responses without reducing the amount of taste identity information available in the "middle epoch." Finally, BLA→GC perturbations changed behavior-linked taste response dynamics themselves, distinctively diminishing the abruptness of ensemble transitions into the late epoch. These results suggest that BLA "organizes" behavior-related GC taste dynamics.

## 1 Introduction

2  
3 A significant part of our daily lives is spent acquiring and consuming food and drink.  
4 The ultimate goal of this pursuit is the ingestion of nutrients that satisfy bodily needs and  
5 maintain physiological health, but our food choices are seldom consciously made to  
6 satisfy such needs. Rather, we eat food that is delicious, regardless of whether it is  
7 nutritious (Baldo et al., 2016; Marshall et al., 2017). In many situations, this still poorly-  
8 understood (Berridge, 2000) drive to consume high-palatability food overwhelms and  
9 subverts the need for nutrition (e.g., binge eating; (Yeomans et al., 2004).

10  
11 Given the centrality of palatability to consumption decisions, it is unsurprising that  
12 palatability-related activity is prominent in gustatory cortical (GC) taste response  
13 dynamics. Across the 0.2-1.5s period following taste delivery (the initial 0.2s of responses  
14 is non-specific), GC neural ensembles progress through a sequence of processing  
15 “epochs,” such that, after briefly coding chemosensory information (the taste “Identity  
16 Epoch”), responses become dominated by activity correlated with hedonics (the  
17 “Palatability Epoch;” (Katz et al., 2001, 2002; Fontanini and Katz, 2006; Sadacca et al.,  
18 2012; Maier and Katz, 2013; Sadacca et al., 2016). The transition between these epochs  
19 occurs suddenly and coherently across GC, a fact that can be observed using ensemble  
20 analyses such as Hidden Markov Modeling (HMM; Jones et al., 2007; Sadacca et al.,  
21 2016). These analyses make it possible, despite significant trial-to-trial variability, to  
22 accurately identify the onset latency of the Palatability Epoch in single trials, and thereby  
23 to show that this ensemble event accurately predicts the onset of palatability-specific  
24 orofacial responses (e.g., gaping, an egestive response typically evoked by aversive bitter  
25 taste stimuli; Li et al., 2016; Sadacca et al., 2016). Furthermore, perturbing the neural  
26 activity preceding this transition interferes with production of these palatability-driven  
27 behaviors (Li et al., 2016; Mukherjee et al., 2019).

28  
29 The very nature of GC taste response dynamics themselves—their complexity,  
30 their coherence, and the transitions in functionality—implies the functioning of complex  
31 networks, suggesting that GC does not perform this task alone (Jones et al., 2006). In  
32 fact, GC does receive potentially relevant input from several brain areas (Krettek and  
33 Price, 1977; Saper, 1982; Allen et al., 1991), notably including the basolateral amygdala  
34 (BLA), a region that: 1) is reciprocally connected with GC (Stone et al., 2011); 2) codes  
35 taste palatability (Fontanini et al., 2009); and 3) participates generally in reward-guided  
36 behavior (Nishijo et al., 1998; Blundell et al., 2001; Balleine et al., 2003; Holland and  
37 Gallagher, 2004). As palatability-related information emerges one epoch earlier in BLA  
38 than in GC (Fontanini et al., 2009), it could be suggested that taste hedonics are “passed”  
39 between the two. Support for this specific hypothesis has come from a study showing that  
40 pharmacological inactivation of BLA impacts GC taste coding (Piette et al., 2012).

41  
42 The interpretability of this earlier study is limited by several factors, however. First,  
43 whole-region pharmacological inhibition impacts all projection pathways; the effect of BLA  
44 inhibition on GC taste coding could be wildly indirect, involving (among others) brain  
45 regions such as lateral hypothalamus (Krettek and Price, 1978; Saper et al., 1979; Berk  
46 and Finkelstein, 1982; Petrovich et al., 2001; Berthoud and Münzberg, 2011) and/or the

47 parabrachial nuclei in the pons (Lundy and Norgren, 2004; Li et al., 2005), both of which  
48 also code taste palatability (Li et al., 2013; Baez-Santiago et al., 2016). Furthermore,  
49 pharmacological inhibition persists for hours, a fact that introduces the possibility that  
50 circuit plasticity (rather than real-time inactivation) might explain the manipulation's effect  
51 on GC coding, and that also renders within-session comparisons of conditions impossible  
52 (greatly limiting the hypotheses that can be tested).

53  
54 Here, we use pathway-specific optogenetics to directly test whether (and how) BLA  
55 input controls GC population coding of taste palatability. We discretely perturbed  
56 BLA→GC axons for 2.5s starting at the time of taste delivery, without silencing somas in  
57 either structure. Our results demonstrate that this perturbation impacts GC taste  
58 responses in an “epoch-wise” manner, in that: 1) the likelihood of firing-rate changes  
59 peaks at epoch onset times, despite the perturbation itself being tonic; 2) the perturbation  
60 reduces Palatability Epoch content, without reducing Identity Epoch information; and 3)  
61 the loss of BLA input “blurs” the onset of the Palatability Epoch by reducing the  
62 suddenness of the firing-rate transition in all neurons in the ensembles. These data  
63 suggest BLA to be more involved in the organization of emergent network dynamics than  
64 in the delivery of palatability information to GC *per se*.

## 67 Results

### 68 *Perturbation of BLA →GC axons (BLA →GCx) impacts taste responses*

69 We analyzed AAV-induced gene expression *via* immunohistochemical evaluation of the  
70 presence of GFP. A representative example of these data is shown in Figure 1. Note the  
71 cell body staining in BLA, and the utter lack of cell body staining in GC, where expression  
72 is restricted to axon filaments. ArchT (which in this case co-expresses with GFP) is carried  
73 from the injection site in BLA in a purely anterograde direction, and a subset of infected  
74 axons terminate in the ventral part of GC—a result consistent with earlier rat and mouse  
75 data (Haley et al., 2016; Levitan et al., 2019). Rats in which GFP expression was not  
76 found in BLA and GC, or in which opto-trodes were misplaced, were excluded from further  
77 data analysis.

78 The data reported below were recorded from four rats in which *post-hoc*  
79 histological examination confirmed good electrode and fiber placements, and substantial  
80 virus expression; the dataset included a total of 140 neurons. For 2 recording sessions/rat  
81 (separated by one rest day), a battery of basic tastes (sucrose, NaCl, citric acid, and  
82 quinine HCl) were delivered via IOC. The impact of BLA→GCx on GC activity was  
83 analyzed using a “within-subject” approach, whereby we compared GC neural  
84 responses in Laser-Off and Laser-On trials. Preliminary analyses revealed that neither  
85 the percentage of recoded neurons impacted by laser stimulation nor the direction of  
86 impact (suppression vs enhancement) significantly differed between the first and second  
87 sessions (all  $X^2 < 1$ ). Nor did strength of impact (*t*-values comparing control and perturbed  
88 trials) significantly differ between recording sessions ( $F = 1.95$ ,  $p > .05$ ). This pattern of  
89 results suggests that in the current experimental setting, the novelty of tastes (i.e.,  
90 difference in taste familiarity between 1<sup>st</sup> and 2<sup>nd</sup> sessions) plays little role in the impact  
91  
92

93 of BLA→GCx on GC taste response. Accordingly, data from the two sessions were pooled  
94 together, without inclusion of session as an additional analysis variable.

95  
96 Activation of the optical silencer ArchT in BLA→GC axons (“BLA→GCx;” i.e., laser  
97 illumination of GC) at the time of taste delivery had a strong impact on taste responses,  
98 but it was immediately clear that this impact wasn’t a simple general reduction of taste  
99 response magnitude. Figure 2 shows representative examples of the various ways in  
100 which BLA→GCx changed GC taste activity. Each panel shows raster plots (top) and the  
101 peri-stimulus time histogram (PSTH; bottom) of the taste response of a single GC neuron  
102 to taste presentation, with laser-on and laser-off trials plotted separately. For the purpose  
103 of visualization, the responses shown here were averaged across all taste trials (these  
104 examples were chosen on the basis of the impact of laser stimulation being comparable  
105 for all taste stimuli). In some cases, taste responses were unaffected by the laser (Figure  
106 2A), whereas in others the responses were enhanced (Figure 2B) and in still others they  
107 were reduced in magnitude (Figures 2C-D).

108  
109 To further investigate the effect of BLA→GCx on the activity of individual GC  
110 neurons, the differences between laser-on and laser-off responses were calculated for  
111 ten 250ms time bins post taste delivery. Figure 2E summarizes this analysis, showing  
112 that the impact of BLA→GCx on individual GC neurons was reliable in direction (increase  
113 or decrease of firing rates) across the entire duration of the change, as indicated by the  
114 relative lack of switching between blue and red colors within any individual row (i.e.,  
115 neuron) of the heatmap. Even with sub-threshold (i.e., non-significant [ $t_s < 1$ ]) changes  
116 included in the plot, positive and negative firing-rate changes are found in the same  
117 neuron only once. The influence of BLA on GC activity can be to increase or decrease  
118 firing, but is largely unimodal for individual neurons.

119  
120 Furthermore, the response changes wrought by the laser did not simply reflect the  
121 laser-on time: the initial 150-200 msec of the responses (i.e., the period preceding the  
122 two taste coding epochs) was unaffected by the laser (only ~10% of our GC neurons were  
123 affected in this early period by the perturbation, also see Figures 5C and 6A), and in some  
124 cases the latency to the laser’s impact was substantially longer (e.g., Figure 2D). The  
125 dispersion of these latencies appears, at least visually, to reflect the timing of the epochs  
126 making up the dynamics of GC taste responses (Katz et al., 2001; Fontanini and Katz,  
127 2006; Jones et al., 2007; Grossman et al., 2008; Miller and Katz, 2010; Sadacca et al.,  
128 2012; Maier and Katz, 2013; Sadacca et al., 2016).

129  
130 Below, we unpack and test these observed impacts of BLA→GCx on taste  
131 response firing in whole sample analyses—first examining the magnitudes and directions  
132 of the firing rate changes, and then the epoch-specific nature of the changes.

133  
134 *Both enhancement and inhibition of GC taste response firing are wrought by optogenetic*  
135 *perturbation of BLA→GC axons*

136  
137 A total of 55.7% of the recorded GC neurons (78 out of 140) produced taste responses  
138 that were impacted by BLA→GCx (Figure 3A: pie chart on the left). Herein we defined a

139 neuron as impacted by laser stimulation if one or more of its control-trial taste-evoked  
140 responses (NaCl, Sucrose, Acid, or QHCl) were significantly different from those in  
141 perturbed trials. The modal result was broad changes—in 46.1% of the neurons affected,  
142 the perturbation changed responses to all 4 taste stimuli, although in other above-chance  
143 fractions of recorded neurons BLA→GCx altered responses to fewer tastants (Figure 3B).  
144 In total, ~40% of the individual taste responses were impacted by the perturbation (Figure  
145 3C).

146  
147 In cases in which BLA→GCx impacted >1 taste response (63 out of 78 neurons;  
148 the solid portion of Figure 3D), the perturbation either consistently suppressed (57.1%:  
149 36 out of 63) or consistently enhanced (42.9%: 27 out of 63) response magnitudes for all  
150 affected taste responses (Figure 3D). That is, if a given neuron's activity was significantly  
151 altered by BLA→GCx, the direction of impact (suppression/enhancement) was the same  
152 across all taste responses.

153  
154 Given that *in vitro* slice recordings (e.g., Haley Fontanini et al. 2016; Haley Bruno  
155 et al. 2020) have shown BLA projection neurons to synapse onto both pyramidal cells  
156 (PCs) and interneurons (INs), it was important to ask whether the effect of BLA→GCx  
157 was cell-type dependent. Our *in vivo* electrophysiology does not permit definitive  
158 determination of cell type, but we were able to distinguish putative PCs from putative INs  
159 based on the shape of the spike waveforms (*cf.* Sirota et al., 2008; Quirk et al., 2009;  
160 Herzog et al., 2019). The ease with which neuron groups could be distinguished using  
161 this criterion is shown in Figure 4A, along with representative neurons of each type (note  
162 the difference in the 2<sup>nd</sup> half width of the two action potentials). Consistent with a great  
163 deal of prior research (e.g., Quirk et al. 2009), putative INs showed (on average)  
164 significantly higher basal firing rates than did putative PCs (Figure 4B).

165  
166 After dividing the sample on this basis, we were in fact able to observe clear  
167 differences in the impact of BLA→GCx on putative PCs and INs. As shown in Figure 4C,  
168 laser stimulation suppressed taste responses in approximately half of the neurons  
169 identified as PCs (n=21 [47%]), but among putative INs, the impact was almost always  
170 suppression (n=19/21 [90%]). This result is consistent with data (e.g., Saper, 1982; Allen  
171 et al., 1991) suggesting that BLA→GC projection neurons provide excitatory  
172 glutamatergic input to both PCs and INs: it would be expected that some changes in PC  
173 responding came directly *via* loss of (excitatory) BLA input, and some as the indirect effect  
174 of a loss of input to inhibitory INs (Stone et al., 2011; Haley et al., 2016); the fact that only  
175 a small portion of INs showed enhanced firing rates, meanwhile, likely reflects the fact  
176 that INs were impacted mostly by direct loss of BLA input (because PCs in sensory  
177 cortices make fewer local connections; see (Zhang et al., 2014; Haley et al., 2016).  
178 Beyond this basic property, however, we observed no significant neuron-type  
179 differences—BLA→GCx changed taste responsiveness, specificity, or palatability-related  
180 activity similarly for INs and PCs (all Chi-Squared > 0.05), a result consistent with our  
181 previous studies showing little evidence of neuron-type specificity in GC taste coding  
182 (Katz et al., 2001; Fontanini and Katz, 2006; Jones et al., 2007). Accordingly, we did not  
183 separate neurons into types for purposes of the subsequent analyses.

184

185 While these results suggest that perturbation of BLA→GC axons alters GC taste  
186 responses, it was important to consider the alternative possibility that the laser directly  
187 perturbs activity in GC neurons (despite the lack of obviously fluorescent GC somas). A  
188 comparison of our data with datasets previously collected in our lab (specifically, data  
189 collected as part of (Mukherjee et al., 2019), however, allows us to reject this hypothesis,  
190 in that the impact of our manipulation is qualitatively different from direct optogenetic  
191 perturbation of GC neurons (Figure 5A). For one thing, our manipulation altered the taste  
192 responses of ~50% of recorded GC neurons (Figure 3A); direct activation of ArchT  
193 expressed in GC somas, meanwhile, changes the taste responses of almost all of the  
194 neurons (91% of the recorded population; Figure 5B1). The nature of the changes differs  
195 between the two preparations, as well: 87.9% of the response changes caused by direct  
196 optical perturbation of GC neurons involve suppression of firing (Figure 5B2)—a  
197 significantly different percentage than that caused by BLA→GCx in this experiment (60%  
198 in Figure 3C;  $\chi^2 = 17.07$ ,  $p < 0.01$ ).

199  
200 The effect of BLA→GCx is further differentiated from that of direct GC neuron  
201 perturbation with regard to the dynamics described above (Figure 2)—most notably, by  
202 the relatively late latency of BLA→GCx's impact on GC taste responses (Figure 5C; red  
203 sigmoid fit), and the accordingly late asymptotic effect (approximately 500 ms after taste  
204 delivery). When GC somas are themselves led to express ArchT channels, in contrast,  
205 laser illumination of GC causes immediate, steeply developing changes that reach  
206 asymptote within ~250 ms. We conclude that the changes in GC activity observed in the  
207 current experiment were not caused by perturbation of GC somas.

208  
209 *Despite tonic laser illumination, the impact of BLA→GCx on GC firing rates is epoch-*  
210 *specific.*

211  
212 As already noted, while the laser was turned on at the time of taste delivery, in the  
213 majority of cases optogenetic perturbation of BLA-GC axonal activity impacted GC taste  
214 response only after substantial delays, leaving the initial 200msec of the responses  
215 unaltered (Figures 2 and 5C). In many cases, the latency of the effect was much longer.  
216 As an initial exploration of this phenomenon, we summarized the distribution of laser  
217 impact latencies across the entire sample of taste responses (Figure 6A; the red dashed  
218 line is the distribution smoothed with a Gaussian). Inspection of this panel reveals that  
219 the onset of changes caused by BLA→GCx is neither uniform nor a simple decay function  
220 (which would be the two most likely results if BLA input played no role in GC temporal  
221 coding). Instead, there are multiple peaks in the function, reflecting multiple “most likely  
222 times” for the onset of perturbation-related changes. One such peak appeared between  
223 300 and 350 ms after taste delivery, and a second appeared approximately 750 ms after  
224 taste delivery. A bi-modal fit of the data suggested the timing these peaks to be 347.28  
225 (SD=110) and 754.39 ms (SD=179), and attempts to fit the data with an exponential decay  
226 function produced a lower coefficient of determination (an index of absolute goodness of  
227 a fit) than that of the Gaussian mixture model; moreover, the error scores at each time  
228 bin (i.e., estimated values – raw values) were significantly smaller with the bi-modal  
229 Gaussian fit than those with exponential fit ( $t(24) = -2.39$ ,  $p < .05$ ).

230

231 This result, surprising given the tonic nature of the experimental manipulation, in  
232 fact dovetails remarkably well with 20+ years of research on the “3-epoch” dynamics of  
233 GC taste processing (Katz et al., 2001; Jones et al., 2007; Sadacca et al., 2016;  
234 Mukherjee et al., 2019; see also Discussion). Consistent with this observation, the nature  
235 of the perturbation’s impact appears to shift around the time of the 2<sup>nd</sup> epoch (the time at  
236 which responses first become taste-specific, see Katz et al., 2001; Fontanini and Katz,  
237 2006; Sadacca et al., 2012): response enhancements predominate prior to this point  
238 (Figure 6B1), while response suppressions are equally likely afterward (Figure 6B2);  
239 Figure 6B3 summarizes this effect, showing the difference between the likelihood of firing-  
240 rate enhancements and suppressions. Together, these results suggest that inhibiting BLA  
241 input to GC across the first 2 sec after taste delivery impacts taste processing in an  
242 “epoch-wise” manner (keeping in mind that such measures are necessarily approximate,  
243 given the vagaries of detecting precise onsets of firing-rate reductions, see Discussion)  
244

245 We next asked whether this “epoch-wise” impact implied “single-epoch” impact—  
246 whether firing rate changes with onset latencies around the time of the middle peak of  
247 Figure 6A (blue dashed arrow) might only last the length of the “identity epoch,” ending  
248 around the beginning of the palatability epoch (i.e., around the time of the late peak in  
249 Figure 6A—the blue dashed arrow). Figure 6C disconfirms this possibility, showing that  
250 only 3 out of the 41 firing-rate modulations (i.e., 8%) were restricted to the identity epoch.  
251 There were, meanwhile, 15 neurons that were impacted only when the palatability epoch  
252 began. This difference between epochs is significant ( $X^2 = 5.86$ ,  $p < .05$ ), and it means  
253 that the majority of the effects of BLA→GCx are felt in the time period in which palatability-  
254 related processing is found.  
255

256 In summary, 2.5-sec perturbations of BLA input to GC change taste-driven activity  
257 in ways that are both non-random and complex—firing is modulated in specific relation to  
258 the dynamics that characterize GC taste processing. Such results imply, consistent with  
259 previous work (Schoenbaum et al., 1998; Pare et al., 2002; Piette et al., 2012), that  
260 disruptions of the BLA→GC pathway might have distinct consequences for different  
261 functional aspects of GC taste responses (aspects that have been shown to “live” in the  
262 different response epochs; see Sadacca et al., 2016; Mukherjee et al., 2019); more  
263 speculatively, they imply that the dynamic nature of GC taste responses might itself be  
264 the product of interactions between the cortex and amygdala. Below, we test these two  
265 hypotheses.  
266

### 267 *Perturbing BLA →GC axons selectively impacts (Late epoch) palatability coding*

268 Unlike taste responses in GC, those in BLA contain only 2 epochs, with the early  
269 detection epoch transitioning directly into the palatability-rich information epoch at  
270 ~200ms following taste delivery (Fontanini et al., 2009). The lack of identity-related activity  
271 in BLA, the well-known involvement of BLA in value coding (e.g., Johnson et al., 2009;  
272 Beyeler et al., 2016; Malvaez et al., 2019), and epoch-specific laser impact on firing rates  
273 (Figure 6) together led us to hypothesize that: 1) taste discriminability would be at most  
274 only minimally altered by perturbation of BLA→GC axons—that our ability to identify the  
275 administered taste stimuli on the basis of GC single-neuron responses (and more  
276 particularly from responses in the middle, “Identity” epoch) would survive the perturbation



277 of BLA input, despite changes in absolute firing rates; and that 2) palatability processing,  
278 which is part and parcel of the Late epoch, would in contrast be greatly affected by  
279 BLA→GCx.

280  
281 To assess the proposed (lack of) influence of BLA→GCx on GC identity coding,  
282 we first brought repeated-measures ANOVAs to bear on Identity epoch responses in laser  
283 and no-laser trials (separately), directly evaluating the incidence of taste specificity (i.e.,  
284 whether a given neuron responded differently at least to one taste from other tastes  
285 across the first 2s of taste processing) in each condition. While the perturbation did  
286 significantly change the firing rates of a large number (78 out of 140 in Figure 3) of  
287 neurons, we observed little evidence that BLA→GCx changed the incidence of taste-  
288 specific responses—the percentage of GC neurons responding in a taste-specific manner  
289 was identical (71.4%) in the two trial types (Figure 7A).

290  
291 A closer look at this result revealed roughly similar distributions of individual taste  
292 responses in the two trial types (Figure 7B). Note that more than 50% of our GC sample  
293 responded to each taste; the fact that this percentage is far higher than 1/4 of 71.4% (the  
294 percentage of neurons that produced taste specific responses) means that GC neurons  
295 are broadly tuned—a result that is consistent with the vast majority of electrophysiological  
296 datasets involving >1-2 deliveries of each taste. GC neurons remained broadly tuned  
297 even when BLA→GC axons were perturbed *via* optogenetic inhibition, such that a chi-  
298 squared analysis failed to identify a significant difference between conditions (Laser Off  
299 vs. On;  $X^2 = 2.78$ ,  $p > .05$ ).

300  
301 Given the fact that BLA→GCx changed firing rates in GC taste responses (Figures  
302 2-6), the results shown in Figures 7A and 7B imply that similar numbers of taste  
303 responses were created and destroyed by BLA→GCx. Figure 7C confirms this implication:  
304 several taste responses were lost when activity in BLA→GC axons was perturbed, but for  
305 each GC neuron for which taste specificity was lost, another neuron became a taste-  
306 specific neuron. Although BLA→GCx changed the specific composition of the neural  
307 ensembles producing taste-specific responses, the tastes continued to be coded by  
308 similarly sized GC populations when BLA input to GC was perturbed.

309  
310 Of course, it remains possible that the magnitude of taste-specific information  
311 contained in the firing of each taste-responsive neuron was reduced by this  
312 manipulation—that despite there being similar numbers of taste-specific responses in  
313 both types of trials, the average “magnitude” of taste specificity in the responses was  
314 reduced by the axonal perturbation. To evaluate this possibility, we asked how well tastes  
315 could be identified by these responses by subjecting the data from sets of simultaneously-  
316 recorded GC neurons to a jack-knife classification test (Foffani and Moxon, 2004), testing  
317 the specific hypothesis that perturbation of BLA input reduces the distinctiveness (i.e.,  
318 classifiability) of GC taste responses.

319  
320 As shown in Figure 7D, we failed to find substantial support for this hypothesis, in  
321 that BLA→GCx again proved to have little impact on the taste specificity of GC firing: the  
322 left panel confirms that GC single-neuron activity was reliably taste-specific—the classifier

323 allowed us to correctly identify each administered taste (x-axis) on more than 50% of the  
324 held-out trials (y-axis), a percentage far higher than chance (25%). An essentially identical  
325 result was obtained from trials in which BLA input to GC was perturbed; furthermore, this  
326 held true regardless of whether we performed the analysis on whole-trial data or limited  
327 our analysis to firing within the Identity epoch.  
328

329 The above result suggests that GC taste responses are discriminable in the  
330 absence of BLA input. This does not mean that the responses are unchanged by  
331 BLA→GCx, however; in fact, many Middle epoch responses were clearly changed by the  
332 input perturbation. To directly determine whether GC uses the same or different taste  
333 codes across laser conditions, we tested whether a classifier trained on one laser  
334 condition could be used to predict taste trials obtained from the other condition. The result  
335 of this analysis is displayed in Figure 7E; in this case, each bar represents the overall  
336 percentage of trials correctly predicted across different training/testing conditions.

337 The results of this analysis are plain: when the classifier was trained and tested on  
338 trials within the same laser condition (the solid gray and green bars), 64% of control trials  
339 and 58% of perturbed trials were correctly classified—the patterns of performance, both  
340 well above chance, do not differ from one another, demonstrating that BLA→GCx had no  
341 deleterious impact on the quality of coding content ( $X^2 = 2.96$ ,  $p > 0.05$ ). Classification  
342 performance dropped, however, when the classifier was tested and trained on different  
343 trial types (left hatched green bar;  $X^2 = 5.22$ ,  $p < 0.05$ ), a reduction that became  
344 significantly worse (45% correctness; right hatched green bar) when the analysis was  
345 focused on neurons for which firing rates were changed by the input perturbation ( $X^2 =$   
346  $30.22$ ,  $p < 0.001$ ). Thus, while GC remains taste discriminative without BLA input, coding  
347 for taste identity is altered.  
348

349 But this result, whereby inhibition of BLA→GC axons changes firing without having  
350 measurable impact on the magnitude of GC taste coding in the first ~750 msec of taste  
351 responses, contrasts strongly with the result of this same perturbation on Late-epochal  
352 palatability-related activity. The representative example shown in Figure 8A illustrates this  
353 impact: Figure 8A1 shows changes in Late-epoch taste responses, and Figure 8A2 shows  
354 the attendant attenuation of palatability-relatedness in the normal pattern of firing (which  
355 is sucrose > NaCl > Acid > QHCl); the growth in firing-palatability correlation across the  
356 2<sup>nd</sup> half-second after taste delivery in control trials (black open circle) is standard for GC  
357 taste responses, but in BLA→GCx trials this correlation rose more slowly (red circles in  
358 Figure 8A2), reached a lower asymptote, and disappeared more quickly.  
359

360 While in some cases BLA→GCx actually increased palatability-relatedness of GC  
361 neurons (see the example in Figure 8B1-2), overall the number of neurons for which Late-  
362 epoch taste response firing rates were significantly correlated with palatability decreased  
363 with the perturbation (Figure 8C; between-condition  $X^2 = 5.49$ ,  $p < .05$ ). Figure 8D reveals  
364 further details, showing that a far larger number (and percentage) of neurons lost  
365 palatability-related firing with BLA→GCx than gained (compare Figures 8C & D to Figures  
366 7A & C). This result was corroborated by a direct comparison of the correlation between  
367 firing and palatability, which was lower—for Late epoch firing only—in perturbed trials  
368 (time x condition  $F(1, 139) = 5.70$ ,  $p < .05$ ). Clearly, there was an overall loss of palatability-

369 related firing in GC, in the absence of significant loss of identity-related information, when  
370 input from BLA was perturbed.

371  
372 *Perturbation of BLA input to GC attenuates the ensemble properties of GC taste activity*

373  
374 The above single-neuron analyses support our hypothesis that direct inputs to GC  
375 from BLA are involved in GC palatability processing, but they also make it clear that this  
376 involvement is far from the whole story. Palatability-relatedness in the firing of some single  
377 neurons was not utterly eliminated by our input manipulation; in some cases it was even  
378 enhanced. This fact is perhaps somewhat surprising given the well-known importance of  
379 amygdala for emotion processing (e.g., Quirk et al., 1995; Schoenbaum et al., 1998;  
380 LeDoux, 2000; Wang et al., 2005; Wassum and Izquierdo, 2015; Beyeler et al., 2018),  
381 and findings suggesting that BLA-GC circuitry is vital for palatability-related behavior  
382 (CTA learning and taste neophobia; Gallo et al., 1992; Lin and Reilly, 2012; Levitan et al.,  
383 2020). Our recent data suggest a possible explanation, however: as previously discussed,  
384 the emergence of Late-epoch palatability coding is revealed, using single-trial analyses  
385 involving Hidden Markov Modeling (HMM), to be a sudden transition into a new ensemble  
386 state, in which firing-rate changes occur simultaneously in multiple GC neurons (Jones et  
387 al., 2007; Miller and Katz, 2010; Sadacca et al., 2016); it is this sudden transition itself  
388 that directly drives behavior (Mukherjee et al., 2019). Perhaps the true extent of the  
389 perturbation effect is best apprehended, not in terms of changes in the magnitudes of  
390 palatability coding, but in terms of the ensemble coherence and/or suddenness of the  
391 transition into palatability-related firing.

392  
393 To examine whether this might be the case—whether BLA→GCx alters the  
394 ensemble properties of this state transition—we subjected our data to Hidden Markov  
395 Modeling (HMM). Figure 9A shows 4 (consecutively collected control) example trials of  
396 spiking activity (vertical hash marks) in a set of simultaneously-recorded neurons  
397 responding to (in this case) NaCl administration, with HMM-calculated probabilities (y-  
398 axis) of states, defined in terms of sets of firing rates across neurons, overlain (colored  
399 solid lines). As we have observed previously, the ensemble firing-rate transitions (the  
400 most likely times of state changes) occurred suddenly in control trials, reflecting the  
401 simultaneous precipitous changes in firing rates in multiple neurons, but varied in latency  
402 from trial to trial (e.g., Jones et al., 2007; Moran and Katz, 2014; Sadacca et al., 2016;  
403 Mukherjee et al., 2019). When these control trials were aligned to the onset of the state  
404 that occupied most of the duration between 500 and 1500 ms post-taste delivery (the  
405 period in which palatability-related firing emerges; see Katz et al., 2001; Jones et al., 2007;  
406 Sadacca et al., 2012) and Figure 8A2) the sharpness of that transition into palatability-  
407 related firing was revealed (Figure 9B1 & 2, black dashed line; Sadacca et al., 2016;  
408 Mukherjee et al., 2019)—sharpness that is obscured in typical across-trial analyses.

409  
410 When we brought the same analysis routine to bear on trials in which activity in  
411 BLA→GC axons was perturbed (Figure 9B1, dashed red line), the transition into  
412 palatability-correlated firing was far less steep than that in control trials from the very  
413 same sessions (and same neural ensembles). To quantify this finding for statistical  
414 evaluation, we fitted sigmoid curves to each transition function (black and red solid lines),

415 and found that the slope of the rise into palatability-correlatedness was significantly lower  
416 for trials in which the laser was turned on than for trials in which the laser was off (as  
417 indicated by the lack of overlap between the 95% credible intervals in Figure 9B2; see  
418 Methods). This result makes it clear that, with activity in BLA→GC axons perturbed, GC  
419 ensemble taste activity fails to transition with normal suddenness into palatability-related  
420 firing.

421  
422 We considered two possible explanations for this result (see Figure 10A): 1) the  
423 possibility that perturbation of BLA input during taste responses caused a general  
424 reduction in the sharpness of firing-rate changes for all individual neurons in an ensemble  
425 (Figure 10A-top); and 2) the possibility that the perturbation left unchanged the firing rate  
426 dynamics of each individual neuron in the ensemble, but “de-coupled” these changes  
427 across neurons (Figure 10A-bottom).

428  
429 To test the first hypothesis, we calculated the slopes of each single neuron’s firing  
430 rate changes across the peri-transition period separately for control and laser trials, and  
431 plotted these results in a scatterplot (Figure 10B). These data would be expected to hover  
432 close to the grey dashed “unity” (slope = 1) line in this plot if BLA→GCx failed to influence  
433 the precipitousness of single-neuron firing rate changes; in fact, however, a regression  
434 analysis of the data revealed that slope (0.42) of the fitting line to be significantly shallower  
435 than 1 ( $p < .05$ ). To probe further, we grouped the data into intervals of slope ranges  
436 calculated in control trials (Figure 10C); perturbation of activity in BLA→GC axons  
437 reduced the rate of firing rate changes ( $ps < .05$ ) across most of these intervals. This  
438 pattern of results strongly supports the hypothesis that the firing rate changes of most  
439 neurons in an ensemble were “blurred” in the vicinity of the transition into palatability-  
440 related firing when BLA→GC axon activity was perturbed. In other words, disconnecting  
441 GC from BLA kept the single neurons within the GC network from changing their firing  
442 rates quickly in the vicinity of the transition into palatability-relatedness; this in turn  
443 explains the loss of suddenness in the GC ensemble transition into the Palatability state.

444  
445 We went on to test the second possible mechanism for the ensemble results,  
446 asking whether BLA→GCx might have (also) directly disorganized ensembles such that  
447 the simultaneity of the transitions was reduced. We identified the times at which each  
448 single neuron’s firing-rate changes in the vicinity of calculated state transitions reached  
449 their maximal slopes (see Methods); these data allow us to determine whether the spread  
450 of these times within a simultaneously-recorded neural ensemble differed depending on  
451 trial type.

452  
453 Figure 10D shows the result of this analysis. While inspection of the figure reveals  
454 a good deal of noise in the distributions (likely the result of the small sample), it does not  
455 suggest any major differences in the spread of the distribution. Certainly the difference  
456 between distributions failed to reach significance ( $X^2 = 13.93$ ,  $p > .05$ ), indicating that the  
457 coherence of the timing of the GC response dynamic has not been altered by the  
458 perturbation of BLA→GC projections, a result consistent with the analysis that found  
459 comparable means of the distributions between each trial type (OFF vs ON trials: -  
460  $17.98 \pm 5.29$ ms vs.  $-16.23 \pm 5.51$ ms). This conclusion is further corroborated by

461 examination, ensemble by ensemble, of the means and standard deviations of the  
462 distributions (Figure 10D inset), which again appear very similar ( $t(6) = -0.33, p > .05$ ).  
463 Overall, the loss of the normally-observed sharp ensemble transitions into palatability-  
464 related firing appears to not reflect decoupling of still sharp single-neuron transitions, but  
465 rather an alteration of the basic functioning of the networks, such that entire ensembles  
466 of neurons fail to cleanly transition from one state to the next.

467  
468 The impact of BLA→GCx on slopes changes during state transition times is not  
469 universal but epoch-dependent. We repeated the same analysis depicted in Figure 10A  
470 on firing rate changes comprising transitions into the identity state (which typically  
471 occurred 100-600ms after taste delivery). We found very little impact of BLA→GCx on  
472 either the sharpness or timing of these firing-rate changes. Figure 11A displays the slopes  
473 of this earlier transition for each individual ensemble and taste, with control trials plotted  
474 against perturbed trials. As revealed by a regression analysis, the fit line (slope = 0.79;  
475 red solid line) did not differ significantly from unity ( $p > .05$ ), indicating that the perturbation  
476 has little impact on the firing rate changes when the ensemble is transitioning into the  
477 identity state. This null effect was confirmed when the range of slopes observed in control  
478 trials was divided into subgroups (Figure 11B); an ANOVA conducted on these data  
479 revealed no significant main effect of Laser ( $F(1,58) = 1.44, p > .05$ ) and no significant  
480 interaction ( $F < 1$ ). When examining the timing of sharpest slope changes relative to  
481 transition times (Figure 11C), we also found no evidence indicating that BLA→GCx alters  
482 the dynamics of firing changes ( $X^2 = 20.06, p > .05$ ). Overall, this pattern of results further  
483 confirms that the input from BLA critically modulates the dynamics of GC taste response  
484 by altering palatability-related activity while leaving the identity processing relatively intact.

## 487 Discussion

488 GC taste processing is not simple. Stimulus responses reflect not just taste identity but  
489 also taste palatability, and through the latter GC acts as an essential element in the  
490 process of not only “coding” but also in the decision process for consumption-driven  
491 behavior. These different activities are mediated, not by distinct subpopulations of  
492 neurons, but by different stages of the response generated by a (mostly) single population  
493 of neurons (Katz et al., 2001; Jones et al., 2007). Such functional complexity all but  
494 requires a circuit wherein the dynamically responsive region integrates input from multiple  
495 brain areas (Maffei et al., 2012; Staszko et al., 2020). Given lesion and pharmacological  
496 studies demonstrating that GC-governed consummatory behavior—both learned (e.g.,  
497 CTA) and innate (taste neophobia)—is impaired following BLA dysfunction, it is  
498 reasonable to hypothesize that BLA might be a region that vitally interacts with GC during  
499 taste processing. The current work tests and confirms this hypothesis, and goes on to  
500 characterize that interaction.

501  
502 The involvement of BLA in GC coding is, as predicted, related to palatability, but the  
503 simplest hypothesis—that BLA simply relays palatability-related information to GC—  
504 proves too simple. BLA→GCx affected both GC taste identity and taste palatability coding,  
505 but only the latter impact was qualitative: while identity-related responses changed,  
506 neither the number of responses showing taste-specificity nor our ability to decode taste

507 identity from the responses was altered by laser stimulation; in the absence of BLA inputs,  
508 taste-specific information remains readily available in GC. In contrast, the palatability-  
509 processing epoch was both quantitatively and qualitatively altered by BLA→GCx—there  
510 was a significant loss of palatability-relatedness in GC taste responses, both in terms of  
511 number of responses showing significant correlations with palatability and in terms of  
512 overall correlation with palatability. This finding extends work demonstrating an impact of  
513 whole-region BLA inactivation (Piette et al., 2012); see also Yamamoto et al., 1984;  
514 Bielavska and Roldan, 1996): by taking advantage of optogenetics to silence a single  
515 axon pathway without silencing somas in either BLA or GC, we show that it is specifically  
516 the direct BLA→GC projection that modulates GC palatability-related activity—  
517 conclusions that are consistent with prior findings that acquisition of learned palatability  
518 changes enhances the BLA-GC connection (Grossman et al., 2008). Optogenetics also  
519 made it possible to perform fine-grained, within-session/within-neuron analyses that  
520 greatly extended our specific understanding of the function of this projection.

521  
522 Those more fine-grained analyses allowed us to expose important complexities of the  
523 effect, revealing that BLA→GCx, despite being tonic, impacts GC function in an “epoch-  
524 wise” manner (see Figures 2 and 6). The onset latencies of that impact were neither  
525 random nor exponentially decaying across time: while some responses were impacted  
526 starting only a few hundred milliseconds after taste delivery, the distribution of latencies  
527 showed peaks around the beginnings of each successive epoch; many responses were  
528 altered only during the palatability epoch (i.e., with effect latencies of ~750 ms after taste  
529 delivery). Meanwhile, for the vast majority (>90%) of responses impacted at shorter  
530 latencies, that impact persisted through the later, palatability epoch. Not only does the  
531 impact of BLA→GCx conform to the dynamics that we have reliably observed in GC taste  
532 processing (Katz et al., 2001; Jones et al., 2007; Sadacca et al., 2012; Sadacca et al.,  
533 2016; Mukherjee et al., 2019), it also impairs late palatability responses while leaving  
534 coding in the identity epoch relatively intact.

535  
536 Previous studies have reported robust effects of similar perturbations on palatability-  
537 guided behavior (CTA learning and taste neophobia; Gallo et al., 1992; Lin et al., 2009;  
538 Lin and Reilly, 2012; Lavi et al., 2018; Levitan et al., 2020). In our hands, however, the  
539 impact of BLA→GCx was less complete, and some GC neurons even gained palatability  
540 responses in perturbed trials (Figure 8B). There are multiple possible explanations for this  
541 mild discrepancy. The relatively brief laser stimulation (2.5-sec in duration) used here to  
542 perturb the system, for instance, could have mitigated the strength of the effect. This  
543 explanation seems unlikely, however, given that even briefer stimulation is sufficient to  
544 significantly alter the production of orofacial responses evoked by taste presentations  
545 (Mukherjee et al., 2019). Alternatively, given the fact that our intervention purposefully  
546 blocks only the direct projection from BLA to GC while leaving the function of BLA cell  
547 bodies intact, residual GC palatability activity could reflect input from BLA routed via a  
548 third area that is anatomically connected to both GC and BLA (perhaps lateral  
549 hypothalamus [LH]). However, this hypothesis is rendered unlikely by the findings of a  
550 previous study (Piette et al. 2012) in which BLA cell body inactivation (achieved *via*  
551 muscimol administration): this wholesale BLA manipulation foreshadowed the results

552 presented here—reducing (rather than eliminating) palatability-related information in GC  
553 taste responses (and sparing identity coding).

554  
555 Thus, the fact that palatability-related activity in GC survives removal of BLA input likely  
556 means that the hedonic taste information reaches GC via an independent pathway not  
557 involving BLA. Two prime candidates are LH and the parabrachial nuclei of the pons  
558 (Yamamoto, 1984; Kosar et al., 1986; Norgren, 1974): both are directly connected to GC  
559 and, importantly, also display similar dynamics of taste responses to those occurring in  
560 GC (Li et al., 2013; Baez-Santiago et al. 2016). Future work will investigate the importance  
561 of these regions in the production of GC dynamics.

562  
563 Regardless of the results of future work, the above-discussed findings, in  
564 conjunction with our own analyses, suggest that the central role played by BLA has to do  
565 with organizing GC taste response dynamics, rather than with driving palatability-related  
566 responses specifically. BLA→GCx significantly “blurred” the onset of palatability-related  
567 activity, which in control trials is a sudden, coherent firing-rate transition. This blurring  
568 could potentially account for behavioral deficits in animals with dysfunction in the BLA-  
569 GC circuitry, in that the loss of activity synchrony severely reduces the occurrence of  
570 learning-related synaptic plasticity (e.g., Li 2018).

571  
572 While a full explanation of how blocking BLA input causes the incoherent  
573 transitions into the palatability epoch in GC must await the results of future  
574 experimentation, work from theoretical neuroscience may offer clues to the underlying  
575 mechanisms. These studies (e.g., Jones et al. 2007; Miller and Katz, 2010; Escola et al.  
576 2011; Mazzucato, Fontanini et al. 2015; Mazzucato, La Camera et al. 2019; La Camera  
577 et al. 2019) suggest that the taste system functions as a nonlinear “attractor network,” in  
578 which (as we have again shown) taste responses evolve through a sequence of discrete,  
579 quasi-stationary ‘states,’ and that the transitions between these states are jointly  
580 determined by the strength of both the attractors and noise impinging upon the network  
581 (Miller and Katz 2010). We hypothesize that BLA is an essential part of this dynamical  
582 system, and that, given the critical involvement of BLA in palatability processing, the loss  
583 of BLA input may reduce the nonlinearity of the attractor dynamics (and to predispose the  
584 network to random noise). Accordingly, the neurons become less well synchronized; they  
585 continue to display palatability activity, but in a less coherent manner.

586  
587 What is the implication of this role of BLA in organizing GC activity? Based on our results,  
588 it is reasonable to speculate that during taste processing, BLA actively interacts with GC  
589 and coordinates activity among cortical neurons, so that the cortical ensemble can  
590 transition suddenly and coherently into the palatability state. An important question,  
591 therefore, has to do with when that interaction occurs. Mukherjee et al. (2019) employed  
592 brief (500 ms in duration) optogenetic inhibition of GC itself, shedding light on this issue.  
593 When GC was inhibited for the first 500 ms of the taste response, a time period that  
594 reliably ended prior to the transition into the palatability epoch, palatability-driven behavior  
595 was significantly delayed—a fact that strongly implies that processing intrinsic to GC is  
596 important in the time leading up to the Late epoch. Combined with the fact that palatability-  
597 related activity occurs much earlier in BLA than it does in GC (Fontanini et al., 2009), we

598 speculate that BLA-GC interactions across the first 0.5-1.0 sec are responsible for  
599 causing the transition into GC palatability epoch; this could be the specific way in which  
600 BLA assists/coordinates the processing of this “emotion-rich” process in GC. Finally,  
601 given the nonlinearity of this dynamic population effect, and the dense reciprocal  
602 connections between BLA and GC, their interaction is unlikely to be unidirectional, a  
603 suggestion that receives support from an earlier study demonstrating that electrical  
604 stimulating GC can alter BLA taste responses (Yamamoto et al., 1984; also see Lavi et  
605 al., 2018).

606  
607 In summary, as revealed in our 20 years of research, taste processing in GC is complex,  
608 involving a sequence of firing rate transformations that chart the evolution of those  
609 responses from reporting the presence of stimuli on the tongue, to discriminating the taste  
610 identity, and then finally to generating affective responses. The nature of this dynamic  
611 process almost necessarily requires that GC collaborates with other brain regions, and  
612 while such a collaboration could simply involve information passage from one area to  
613 another, the results of the current research suggest that GC palatability-related activity is  
614 organized by connections to GC from BLA. Future work will assess whether input to GC  
615 received from other regions, such as LH, gustatory thalamus (Cechetto and Saper, 1987),  
616 and parabrachial nucleus play similar or complementary roles in the processing of taste  
617 information in the service of modulating feeding behavior.

618  
619

## 620 **Materials and Methods**

### 621 *Subjects*

622 The experimental subjects were female Long-Evans rats (Charles River Laboratory,  
623 Raleigh, NC), singly housed in a vivarium with controlled temperature and 12:12 h light-  
624 dark cycle (lights on at 7:00 am). Given that several previous studies have failed to reveal  
625 any significant M/F differences, we chose to use female rats—a decision that maximized  
626 the validity of comparisons to our previous papers (many of which have used female rats)  
627 and allowed us to take advantage of the fact that female rats are relatively docile to handle  
628 (and therefore allow better recording quality than the males). The rats were given *ad*  
629 *libitum* food and water until experimentation. All procedures complied with the regulations  
630 of the Institutional Animal Care and Use Committee (IACUC) at Brandeis University.

631  
632

### 632 *Apparatus*

633 Neural recordings were made in a custom Faraday cage (6 x 24 x 33 cm) connected to a  
634 PC and Raspberry Pi computer (Model 3B). The Pi controlled opening time and duration  
635 of solenoid taste delivery valves, and an iris allowing laser stimulation (Laserglow  
636 Technologies, Toronto, CA). The PC controlled and saved electrophysiological  
637 recordings taken from opto-trode bundles *via* connections to an Intan system (RHD2000  
638 Evaluation System and Amplifier Boards; Intan Technologies, LLC, LA). Each bundle  
639 consisted of 32 microwires (0.0015inch formvar-coated nichrome wire; AM Systems) and  
640 one optical fiber (0.22 numerical aperture, 200mm core, inserted through a 2.5mm  
641 multimode stainless-steel ferrule; Thorlabs). The microwire bundle was glued to a  
642 custom-made electrode-interface board (San Francisco Circuits) and soldered to a 32-



643 channel Omnetics connector, which was fixed to an adjustable drive (movable along the  
644 dorsal-ventral axis) so that multiple recording sessions could be done from a single rat.

645

### 646 *Surgery*

647 Each rat received a pair of surgeries. In the first surgery, rats were anesthetized with an  
648 intraperitoneal (ip) ketamine/xylazine mixture (100 mg/kg, 5.2 mg/kg, respectively), and  
649 then mounted in a stereotaxic instrument (David Kopf Instruments; Tujunga, CA) with  
650 blunt ear bars. A midline incision exposed the skull and a trephine hole (~2 mm diameter)  
651 was drilled above BLA in each hemisphere. Thereafter, the construct (AAV-CAG-ArchT-  
652 GFP; <http://www.med.unc.edu/genetherapy/vectorcore>) was infused through a glass  
653 pipette (tip ~30  $\mu$ m) bilaterally into BLA with the following coordinates: Site 1: AP -2.0 mm,  
654 ML  $\pm$ 4.9 mm, DV -7.8 mm; Site 2: AP -3.0 mm, ML  $\pm$ 5.1 mm, DV -8.1 mm; all  
655 measurements relative to bregma. At each site, 0.5  $\mu$ l of ArchT virus was infused with a  
656 speed of 50 nl/10 sec. Approximately 5 minutes after each infusion, the micropipette was  
657 slowly raised out of the brain. After the last infusion, the incision was closed with wound  
658 clippers, and the rat was returned to its home cage in the vivarium.

659 For the second surgery, which took place 3-4 weeks after the first, the skull was  
660 again exposed, trephine holes were bored over GC, and multi-channel electrodes+optical  
661 fiber ('opto-trode') were implanted just above GC at the coordinates: AP +1.4 mm, ML  
662  $\pm$ 5.0 mm, DV -4.5 mm. Once in place, the opto-trodes were cemented to the skull, along  
663 with an intra-oral cannula (IOC), using dental acrylic (Fontanini and Katz, 2006).

664 The rat's body temperature was monitored and maintained at ~37 °C by a heating  
665 pad throughout the duration of the surgery.

666

### 667 *Experimental design*

668 Following 5 days of recovery from the second surgery, rats were placed on a mild water  
669 restriction regimen (25 ml of water offered during the dark portion of the light-cycle). Three  
670 days into this schedule, rats began 2 days of habituation to liquid delivered directly to the  
671 tongue via IOC, with 120 40- $\mu$ l infusions of water delivered per session. Thereafter, tastes  
672 replaced water, and *in vivo* electrophysiology recording sessions commenced. All  
673 recording sessions took place in the mornings. In each trial during these sessions, one of  
674 4 gustatory stimuli (0.1M NaCl, 0.3M Sucrose, 0.1M Citric Acid [Acid] and 1mM Quinine-  
675 HCl [QHCl]) was pseudo-randomly chosen for delivery; these stimuli and concentrations  
676 were chosen because they ensured, in addition to a range of distinct taste identities, a  
677 wide range of palatabilities, thereby facilitating our analyses (see below).

678 Rats received 30 trials of each taste, each trial consisting of 40  $\mu$ l infusions; inter-  
679 trial intervals were 20 sec, which we have found is long enough to allow rats to self-rinse.  
680 On 50% of trials for each tastant, activity in BLA $\rightarrow$ GC axons was perturbed via the opto-  
681 trodes; analyses compared perturbation to non-perturbation trials, within-session.  
682 Perturbation (nominally inactivation) was induced with a 532 nm (30-40 mW at tip, ArchT)  
683 laser, turned on for the 2500 ms following taste delivery.

684

685

### 686 *Histology*

687 At the completion of the experiment, rats were deeply anesthetized with  
688 ketamine/xylazine (120:15 mg/kg, IP) and then perfused transcardially with physiological

689 saline followed by 10% formalin. The brains were extracted and stored in a 10% formalin  
690 / 30% sucrose solution for at least 3 days, after which they were frozen and sliced on a  
691 sliding microtome (Leica SM2010R, Leica Microsystems; thickness 50  $\mu$ m). Slices were  
692 stained and mounted using an established protocol (Flores et al. 2018; Li et al. 2016),  
693 and ArchT-expression in GC and BLA was evaluated *via* inspection of fluorescence  
694 (eGFP) under a Keyence fluorescence microscope.

695

#### 696 *Neural data collection and analyses*

697 Electrophysiological signals from the micro-electrodes were sampled at 30 kHz using a  
698 32-channel analog-to-digital converter chip (RHD2132) from Intan Technologies. The  
699 signals were digitalized online at the head stage and saved to the hard drive of the PC.  
700 The collected recordings were then sorted and analyzed off-line with a set of Python  
701 analysis scripts (cf. [https://github.com/narendramukherjee/blech\\_clust](https://github.com/narendramukherjee/blech_clust)). Putative single-  
702 neuron waveforms (3:1 signal-to-noise ratio) were sorted using a semi-supervised  
703 methodology: recorded voltage data were filtered between 300-3000Hz, grouped into  
704 potential clusters by a Gaussian Mixture Model (GMM), and clusters were labeled and/or  
705 refined manually (to enhance conservatism) by the experimenters (for details see  
706 Mukherjee et al., 2017).

707

708 *Taste responsivity.* A neuron was deemed to be taste responsive if taste-driven  
709 firing rates (from 0 to 2 s post-taste delivery) were significantly higher or lower (paired-  
710 sample *t*-tests) than pre-stimulus baseline activity (2 s before taste delivery). This analysis  
711 collapses across all four tastes, such that “taste responsivity” indicates purely that a GC  
712 neuron responds to taste delivery and reveals nothing about taste specificity (which is  
713 described below).

714

715 *Taste specificity.* To determine whether a GC neuron responds distinctly to some  
716 subset of the 4 taste stimuli, we performed two-way repeated measures analyses of  
717 variance (ANOVA), with Taste and Time as variables, on 2 seconds of post-delivery firing  
718 rates (broken into four 500-ms bins, to facilitate comparison with previous reports of taste  
719 dynamics; Katz et al., 2001). Significance of either the taste main effect or the taste x time  
720 Interaction indicates that the firing of the neurons conveys information specific to the taste  
721 stimulus—that is, the response to at least one taste differs significantly from the response  
722 to at least one other taste.

723 Note that a neuron may potentially fail to be identified as “taste responsive” while  
724 nonetheless displaying “taste-specific” activity. This occurs, for example, when some  
725 tastes increase GC firing but others decrease it, and is noteworthy because it reflects the  
726 multifaceted nature of taste responses in GC.

727 A jack-knife classification algorithm was also employed to further evaluate the  
728 impact of BLA→GCx on how well tastes could be identified (Foffani and Moxon, 2004).  
729 Single trials of ensemble taste responses taken from 250 to 1750 ms post-stimulus time  
730 were first binned into 250-ms bins and compared to the average responses of all other  
731 trials for each taste (the single trial being compared was left out/jack-knifed). Using the  
732 number of units in each ensemble as the space dimension, Euclidean distance was then  
733 calculated from each single trial to the taste template (average responses of each taste).  
734 A trial was classified as correct when the minimal distance occurred between the trial and

735 the same taste's template. Performance greater than 25% (i.e., the chance level)  
736 indicates taste specificity.

737  
738 *Taste palatability.* Correlation coefficients were calculated to evaluate the degree  
739 to which taste-driven firing rates reflect the hedonic value of tastes. As hedonic value can  
740 be treated as a ranked variable, we used the nonparametric Spearman's rho test to  
741 compute these correlations. A great deal of prior literature (e.g., Sinclair et al., 2015;  
742 Tordoff et al., 2015), including data collected in our laboratory (Sadacca et al., 2012; Li et  
743 al., 2013), confirms that the palatability order of the four tastes used here is reliably  
744 sucrose > NaCl > Acid > QHCl.

745 To reveal the dynamics of palatability-relatedness in GC single-neuron activity, we  
746 conducted a "moving window analysis"—extracting 250 ms segments of each neuron's  
747 evoked response to each taste, evaluating the response-palatability correlation, sliding  
748 the time window 25 ms forward, performing the analysis again, etc. Responses were  
749 deemed palatability-related if this correlation was significant ( $p < .05$ ) for 3 or more  
750 consecutive bin windows.

751  
752 *Determining the impact of BLA → GCx on neuronal firing.* We built a hierarchical  
753 Poisson generalized linear model (GLM) to estimate the change in taste-evoked GC  
754 activity induced by laser stimulation. For each neuron, we specifically compared the mean  
755 firing rates during the laser duration (0 - 2500 ms post-taste delivery) in control and  
756 perturbed trials for each taste stimulus. Taking advantage of the Poisson distribution's  
757 suitability for spiking data (Kass and Ventura, 2001; Trousdale et al., 2013), this GLM  
758 model can accurately estimate the significance of changes in neural firing. Model  
759 parameters include the mean firing rates for every taste and optogenetic perturbation  
760 condition, that are in turn composed of taste- and perturbation- specific effects ('random  
761 effects') and means across tastes and perturbation conditions ('fixed effects'). For each  
762 neuron  $n$  in our dataset, we aggregated the spikes produced on trial  $i$  of taste  $T$  in  
763 optogenetic perturbation condition  $O$ . There were four levels for  $T$ , corresponding to the  
764 four tastes used in our dataset (sucrose, NaCl, Acid, and QHCl). The number of levels for  
765  $O$  were two (control and perturbed trials).

766 We used Markov Chain Monte Carlo methods (MCMC; specifically, the No-U-Turn  
767 sampler) to sample the posterior distribution of  $firing_{n;T;O}$  for every taste and condition. We  
768 performed this analysis for every neuron in our dataset, and ultimately calculated the  
769 impact of perturbation on firing as the difference in  $firing_{n;T;O}$  between control and  
770 perturbation trials. A significant impact of laser stimulation on neuronal firing was  
771 concluded if the 95% Bayesian credible interval for these differences in  $firing_{n;T;O}$  for a  
772 neuron did not overlap 0 (see Mukherjee et al. 2019 for details).

773  
774 *Hidden Markov Models (HMMs).* Initially developed for speech recognition, HMM  
775 has recently gained attention as a way to analyze *in vivo* electrophysiology with the utility  
776 of determining whether population neuronal activity shifts from ensemble state to  
777 ensemble state (Rabiner, 1989; Seidemann et al., 1996; Gat et al., 1997; Jones et al.,  
778 2007; Kemere et al., 2008; Miller and Katz, 2010). In accordance with our well-tested  
779 model of dynamic GC taste responses, HMM reveals the degree to which data can be  
780 described as reflecting a sequence of two taste-specific (first identity- and then

781 palatability-related) states. Trained on neural ensemble data containing neurons from  
782 both hemispheres, the algorithm returns its best estimate of the set of underlying states,  
783 each defined as a vector of firing rates—one for each neuron—as well as the probability  
784 of transitioning from any one state to any other.

785  
786 *Post-HMM realignment.* For each hidden Markov model, we determined the  
787 putative underlying state with the highest probability of occurring across all trials within a  
788 time window identified, on the basis of current results (Figure 8) and previous work (Katz  
789 et al., 2001; Grossman et al., 2008; Sadacca et al., 2016), as being the time at which  
790 rising ramps of palatability, observed using analyses keyed to stimulus delivery, reach  
791 asymptote (between 0.5-1.5 s after taste delivery). These states were deemed the most  
792 likely candidate “palatability” states. The onset time of these “palatability” states was  
793 determined as the time at which the identified state reached the 0.5 probability threshold  
794 on each trial. The ensemble data were then re-aligned to these onset times as the “zero”  
795 time point of each trial. Following data alignment, we repeated the above-described  
796 palatability analyses that had already been brought to bear on stimulus-aligned data  
797 (taste palatability section).

798 To determine whether BLA→GCx altered the quality of state transitions, we  
799 compared how the PSTH changes around the transitions into the late, palatability, state  
800 between Laser-Off and Laser-On conditions. Using a moving window analysis (100-ms  
801 window, 20-ms step), we measured 1) the slope of PSTH changes around the transition  
802 time, and 2) the latency between when the largest PSTH changed and the transition time.  
803 The peri-transition time period used for this analysis was 160-ms; the pattern of results,  
804 however, remained unchanged if the time-period was limited between 100-200 ms.

805  
806  
807

808 **Acknowledgements**

809

810           This work was supported by grants DC006666 (D.B.K.) and DC016706 (J.-Y.L.)  
811 from the National Institute of Deafness and Other Communication Disorders. For data  
812 analysis, we used the Extreme Science and Engineering Discovery Environment  
813 (XSEDE), which is supported by National Science Foundation (Grant #: IBN180002). We  
814 thank the members of Katz Laboratory for their valuable input.

815

816

817

## 818 **References**

- 819 Allen GV, Saper CB, Hurley KM, Cechetto DF (1991) Organization of visceral and limbic  
820 connections in the insular cortex of the rat. *J Comp Neurol* 311:1-16.
- 821 Baez-Santiago MA, Reid EE, Moran A, Maier JX, Marrero-Garcia Y, Katz DB (2016)  
822 Dynamic taste responses of parabrachial pontine neurons in awake rats. *J*  
823 *Neurophysiol* 115:1314-1323.
- 824 Baldo BA, Spencer RC, Sadeghian K, Mena JD (2016) GABA-mediated inactivation of  
825 medial prefrontal and agranular insular cortex in the rat: contrasting effects on  
826 hunger-and palatability-driven feeding. *Neuropsychopharmacology* 41:960.
- 827 Balleine BW, Killcross AS, Dickinson A (2003) The effect of lesions of the basolateral  
828 amygdala on instrumental conditioning. *J Neurosci* 23:666-675.
- 829 Berk ML, Finkelstein JA (1982) Efferent connections of the lateral hypothalamic area of  
830 the rat: an autoradiographic investigation. *Brain Res Bull* 8:511-526.
- 831 Berridge KC (2000) Measuring hedonic impact in animals and infants: microstructure of  
832 affective taste reactivity patterns. *Neurosci Biobehav Rev* 24:173-198.
- 833 Berthoud H-R, Münzberg H (2011) The lateral hypothalamus as integrator of metabolic  
834 and environmental needs: from electrical self-stimulation to opto-genetics. *Physiol*  
835 *Behav* 104:29-39.
- 836 Beyeler A, Chang CJ, Silvestre M, Leveque C, Namburi P, Wildes CP, Tye KM (2018)  
837 Organization of Valence-Encoding and Projection-Defined Neurons in the  
838 Basolateral Amygdala. *Cell Rep* 22:905-918.
- 839 Beyeler A, Namburi P, Glober GF, Simonnet C, Calhoon GG, Conyers GF, Luck R, Wildes  
840 CP, Tye KM (2016) Divergent Routing of Positive and Negative Information from  
841 the Amygdala during Memory Retrieval. *Neuron* 90:348-361.
- 842 Bielavska E, Roldan G (1996) Ipsilateral connections between the gustatory cortex,  
843 amygdala and parabrachial nucleus are necessary for acquisition and retrieval of  
844 conditioned taste aversion in rats. *Behav Brain Res* 81:25-31.
- 845 Blundell P, Hall G, Killcross S (2001) Lesions of the basolateral amygdala disrupt  
846 selective aspects of reinforcer representation in rats. *J Neurosci* 21:9018-9026.
- 847 Cechetto DF, Saper CB (1987) Evidence for a viscerotopic sensory representation in the  
848 cortex and thalamus in the rat. *J Comp Neurol* 262:27-45.
- 849 Escola S, Fontanini A, Katz DB, Paninski L (2011) Hidden Markov models for the  
850 stimulus-response relationships of multistate neural systems. *Neural Comput* 23:  
851 1071-1132
- 852 Flores VL, Parmet T, Mukherjee N, Nelson S, Katz DB, Levitan D (2018). The role of the  
853 gustatory cortex in incidental experience-evoked enhancement of later taste  
854 learning. *Learn Mem* 25: 587-600.
- 855 Foffani G, Moxon KA (2004) PSTH-based classification of sensory stimuli using  
856 ensembles of single neurons. *J Neurosci Methods* 135:107-120.
- 857 Fontanini A, Katz DB (2006) State-dependent modulation of time-varying gustatory  
858 responses. *J Neurophysiol* 96:3183-3193.
- 859 Fontanini A, Grossman SE, Figueroa JA, Katz DB (2009) Distinct subtypes of basolateral  
860 amygdala taste neurons reflect palatability and reward. *J Neurosci* 29:2486-2495.
- 861 Gallo M, Roldan G, Bures J (1992) Differential involvement of gustatory insular cortex  
862 and amygdala in the acquisition and retrieval of conditioned taste aversion in rats.  
863 *Behav Brain Res* 52:91-97.

- 864 Gat I, Tishby N, Abeles M (1997) Hidden Markov modelling of simultaneously recorded  
865 cells in the associative cortex of behaving monkeys. *Network: Computation in*  
866 *neural systems* 8:297-322.
- 867 Grossman SE, Fontanini A, Wieskopf JS, Katz DB (2008) Learning-related plasticity of  
868 temporal coding in simultaneously recorded amygdala-cortical ensembles. *J*  
869 *Neurosci* 28:2864-2873.
- 870 Haley MS, Fontanini A, Maffei A (2016) Laminar- and Target-Specific Amygdalar Inputs  
871 in Rat Primary Gustatory Cortex. *J Neurosci* 36:2623-2637.
- 872 Haley MS, Bruno S, Fontanini A, Maffei A (2020) LTD at amygdalocortical synapses as a  
873 novel mechanism for hedonic learning. *Elife* 9:e55175.
- 874 Herzog LE, Pascual LM, Scott SJ, Mathieson ER, Katz DB, Jadhav SP (2019) Interaction  
875 of Taste and Place Coding in the Hippocampus. *J Neurosci* 39:3057-3069.
- 876 Holland PC, Gallagher M (2004) Amygdala-frontal interactions and reward expectancy.  
877 *Curr Opin Neurobiol* 14:148-155.
- 878 Johnson AW, Gallagher M, Holland PC (2009) The basolateral amygdala is critical to the  
879 expression of pavlovian and instrumental outcome-specific reinforcer devaluation  
880 effects. *J Neurosci* 29:696-704.
- 881 Jones LM, Fontanini A, Katz DB (2006) Gustatory processing: a dynamic systems  
882 approach. *Curr Opin Neurobiol* 16:420-428.
- 883 Jones LM, Fontanini A, Sadacca BF, Miller P, Katz DB (2007) Natural stimuli evoke  
884 dynamic sequences of states in sensory cortical ensembles. *Proc Natl Acad Sci U*  
885 *S A* 104:18772-18777.
- 886 Kass RE, Ventura V (2001) A spike-train probability model. *Neural Comput* 13:1713-1720.
- 887 Katz DB, Simon SA, Nicolelis MA (2001) Dynamic and multimodal responses of gustatory  
888 cortical neurons in awake rats. *J Neurosci* 21:4478-4489.
- 889 Katz DB, Simon SA, Nicolelis MA (2002) Taste-specific neuronal ensembles in the  
890 gustatory cortex of awake rats. *J Neurosci* 22:1850-1857.
- 891 Kemere C, Santhanam G, Yu BM, Afshar A, Ryu SI, Meng TH, Shenoy KV (2008)  
892 Detecting neural-state transitions using hidden Markov models for motor cortical  
893 prostheses. *J Neurophysiol* 100:2441-2452.
- 894 Krettek J, Price J (1978) Amygdaloid projections to subcortical structures within the basal  
895 forebrain and brainstem in the rat and cat. *J Comp Neurol* 178:225-253.
- 896 Krettek JE, Price JL (1977) Projections from the amygdaloid complex to the cerebral  
897 cortex and thalamus in the rat and cat. *J Comp Neurol* 172:687-722.
- 898 La Camera G, Fontanini A, Mazzucato L (2019) Cortical computations via metastable  
899 activity. *Curr Opin Neurobiol* 58: 37-45.
- 900 Lavi K, Jacobson GA, Rosenblum K, Luthi A (2018) Encoding of Conditioned Taste  
901 Aversion in Cortico-Amygdala Circuits. *Cell Rep* 24:278-283.
- 902 LeDoux JE (2000) Emotion circuits in the brain. *Annu Rev Neurosci* 23:155-184.
- 903 Levitan D, Lin JY, Wachutka J, Mukherjee N, Nelson SB, Katz DB (2019) Single and  
904 population coding of taste in the gustatory cortex of awake mice. *J Neurophysiol*  
905 122:1342-1356.
- 906 Levitan D, Liu C, Yang T, Shima Y, Lin JY, Wachutka J, Marrero Y, Ali Marandi Ghoddousi  
907 R, Veiga Beltrame ED, Richter TA, Katz DB, Nelson SB (2020) Deletion of Stk11  
908 and Fos in mouse BLA projection neurons alters intrinsic excitability and impairs  
909 formation of long-term aversive memory. *Elife* 9.

- 910 Li CS, Cho YK, Smith DV (2005) Modulation of parabrachial taste neurons by electrical  
911 and chemical stimulation of the lateral hypothalamus and amygdala. *J*  
912 *Neurophysiol* 93:1183-1196.
- 913 Li JX, Yoshida T, Monk KJ, Katz DB (2013) Lateral hypothalamus contains two types of  
914 palatability-related taste responses with distinct dynamics. *J Neurosci* 33:9462-  
915 9473.
- 916 Li JX, Maier JX, Reid EE, Katz DB (2016) Sensory Cortical Activity Is Related to the  
917 Selection of a Rhythmic Motor Action Pattern. *J Neurosci* 36:5596-5607.
- 918 Lin JY, Reilly S (2012) Amygdala-gustatory insular cortex connections and taste  
919 neophobia. *Behav Brain Res* 235:182-188.
- 920 Lin JY, Roman C, St Andre J, Reilly S (2009) Taste, olfactory and trigeminal neophobia  
921 in rats with forebrain lesions. *Brain Res* 1251:195-203.
- 922 Lundy RF, Jr., Norgren R (2004) Activity in the hypothalamus, amygdala, and cortex  
923 generates bilateral and convergent modulation of pontine gustatory neurons. *J*  
924 *Neurophysiol* 91:1143-1157.
- 925 Mazzucato L, Fontanini A, La Camera G (2015) Dynamics of multistable states during  
926 ongoing and evoked cortical activity. *J Neurosci* 35: 8214-8231.
- 927 Mazzucato L, La Camera G, Fontanini A (2019) Expectation-induced modulation of  
928 metastable activity underlies faster coding of sensory stimuli. *Nat Neurosci* 22:  
929 787-796.
- 930 Maffei A, Haley M, Fontanini A (2012) Neural processing of gustatory information in  
931 insular circuits. *Curr Opin Neurobiol* 22:709-716.
- 932 Maier JX, Katz DB (2013) Neural dynamics in response to binary taste mixtures. *J*  
933 *Neurophysiol* 109:2108-2117.
- 934 Malvaez M, Shieh C, Murphy MD, Greenfield VY, Wassum KM (2019) Distinct cortical-  
935 amygdala projections drive reward value encoding and retrieval. *Nat Neurosci*  
936 22:762-769.
- 937 Marshall AT, Liu AT, Murphy NP, Maidment NT, Ostlund SB (2017) Sex-specific  
938 enhancement of palatability-driven feeding in adolescent rats. *PLoS One*  
939 12:e0180907.
- 940 Miller P, Katz DB (2010) Stochastic transitions between neural states in taste processing  
941 and decision-making. *J Neurosci* 30:2559-2570.
- 942 Moran A, Katz DB (2014) Sensory cortical population dynamics uniquely track behavior  
943 across learning and extinction. *J Neurosci* 34:1248-1257.
- 944 Mukherjee N, Wachutka J, Katz DB (2017) Python meets systems neuroscience:  
945 affordable, scalable and open-source electrophysiology in awake, behaving  
946 rodents. In: *Proceedings of the 15th Python in Science Conference*, p 104.
- 947 Mukherjee N, Wachutka J, Katz DB (2019) Impact of precisely-timed inhibition of  
948 gustatory cortex on taste behavior depends on single-trial ensemble dynamics.  
949 *Elife* 8.
- 950 Nishijo H, Uwano T, Tamura R, Ono T (1998) Gustatory and multimodal neuronal  
951 responses in the amygdala during licking and discrimination of sensory stimuli in  
952 awake rats. *J Neurophysiol* 79:21-36.
- 953 Pare D, Collins DR, Pelletier JG (2002) Amygdala oscillations and the consolidation of  
954 emotional memories. *Trends Cogn Sci* 6:306-314.



- 955 Petrovich GD, Canteras NS, Swanson LW (2001) Combinatorial amygdalar inputs to  
956 hippocampal domains and hypothalamic behavior systems. *Brain research*  
957 *reviews* 38:247-289.
- 958 Piette CE, Baez-Santiago MA, Reid EE, Katz DB, Moran A (2012) Inactivation of  
959 basolateral amygdala specifically eliminates palatability-related information in  
960 cortical sensory responses. *J Neurosci* 32:9981-9991.
- 961 Quirk GJ, Repa C, LeDoux JE (1995) Fear conditioning enhances short-latency auditory  
962 responses of lateral amygdala neurons: parallel recordings in the freely behaving  
963 rat. *Neuron* 15:1029-1039.
- 964 Quirk MC, Sosulski DL, Feierstein CE, Uchida N, Mainen ZF (2009) A defined network of  
965 fast-spiking interneurons in orbitofrontal cortex: responses to behavioral  
966 contingencies and ketamine administration. *Front Syst Neurosci* 3:13.
- 967 Rabiner LR (1989) A tutorial on hidden Markov models and selected applications in  
968 speech recognition. *Proceedings of the IEEE* 77:257-286.
- 969 Sadacca BF, Rothwax JT, Katz DB (2012) Sodium concentration coding gives way to  
970 evaluative coding in cortex and amygdala. *J Neurosci* 32:9999-10011.
- 971 Sadacca BF, Mukherjee N, Vladusich T, Li JX, Katz DB, Miller P (2016) The behavioral  
972 relevance of cortical neural ensemble responses emerges suddenly. *J Neurosci*  
973 36:655-669.
- 974 Saper C, Swanson L, Cowan W (1979) An autoradiographic study of the efferent  
975 connections of the lateral hypothalamic area in the rat. *J Comp Neurol* 183:689-  
976 706.
- 977 Saper CB (1982) Convergence of autonomic and limbic connections in the insular cortex  
978 of the rat. *J Comp Neurol* 210:163-173.
- 979 Schoenbaum G, Chiba AA, Gallagher M (1998) Orbitofrontal cortex and basolateral  
980 amygdala encode expected outcomes during learning. *Nat Neurosci* 1:155-159.
- 981 Seidemann E, Meilijson I, Abeles M, Bergman H, Vaadia E (1996) Simultaneously  
982 recorded single units in the frontal cortex go through sequences of discrete and  
983 stable states in monkeys performing a delayed localization task. *J Neurosci*  
984 16:752-768.
- 985 Sinclair MS, Perea-Martinez I, Abouyared M, John SJS, Chaudhari N (2015) Oxytocin  
986 decreases sweet taste sensitivity in mice. *Physiol Behav* 141:103-110.
- 987 Sirota A, Montgomery S, Fujisawa S, Isomura Y, Zugaro M, Buzsaki G (2008)  
988 Entrainment of neocortical neurons and gamma oscillations by the hippocampal  
989 theta rhythm. *Neuron* 60:683-697.
- 990 Staszko SM, Boughter JD, Jr., Fletcher ML (2020) Taste coding strategies in insular  
991 cortex. *Exp Biol Med (Maywood)* 245:448-455.
- 992 Stone ME, Maffei A, Fontanini A (2011) Amygdala stimulation evokes time-varying  
993 synaptic responses in the gustatory cortex of anesthetized rats. *Front Integr*  
994 *Neurosci* 5:3.
- 995 Tordoff MG, Aleman TR, Ellis HT, Ohmoto M, Matsumoto I, Shestopalov VI, Mitchell CH,  
996 Foskett JK, Poole RL (2015) Normal taste acceptance and preference of PANX1  
997 knockout mice. *Chem Senses* 40:453-459.
- 998 Trousdale J, Hu Y, Shea-Brown E, Josic K (2013) A generative spike train model with  
999 time-structured higher order correlations. *Front Comput Neurosci* 7:84.

- 1000 Wang SH, Ostlund SB, Nader K, Balleine BW (2005) Consolidation and reconsolidation  
1001 of incentive learning in the amygdala. *J Neurosci* 25:830-835.
- 1002 Wassum KM, Izquierdo A (2015) The basolateral amygdala in reward learning and  
1003 addiction. *Neurosci Biobehav Rev* 57:271-283.
- 1004 Yamamoto T, Azuma S, Kawamura Y (1984) Functional relations between the cortical  
1005 gustatory area and the amygdala: electrophysiological and behavioral studies in  
1006 rats. *Exp Brain Res* 56:23-31.
- 1007 Yeomans MR, Blundell JE, Leshem M (2004) Palatability: response to nutritional need or  
1008 need-free stimulation of appetite? *Br J Nutr* 92:S3-S14.
- 1009 Zhang S, Xu M, Kamigaki T, Hoang Do JP, Chang WC, Jenvay S, Miyamichi K, Luo L,  
1010 Dan Y (2014) Selective attention. Long-range and local circuits for top-down  
1011 modulation of visual cortex processing. *Science* 345:660-665.
- 1012

1013 **Figure 1**

1014

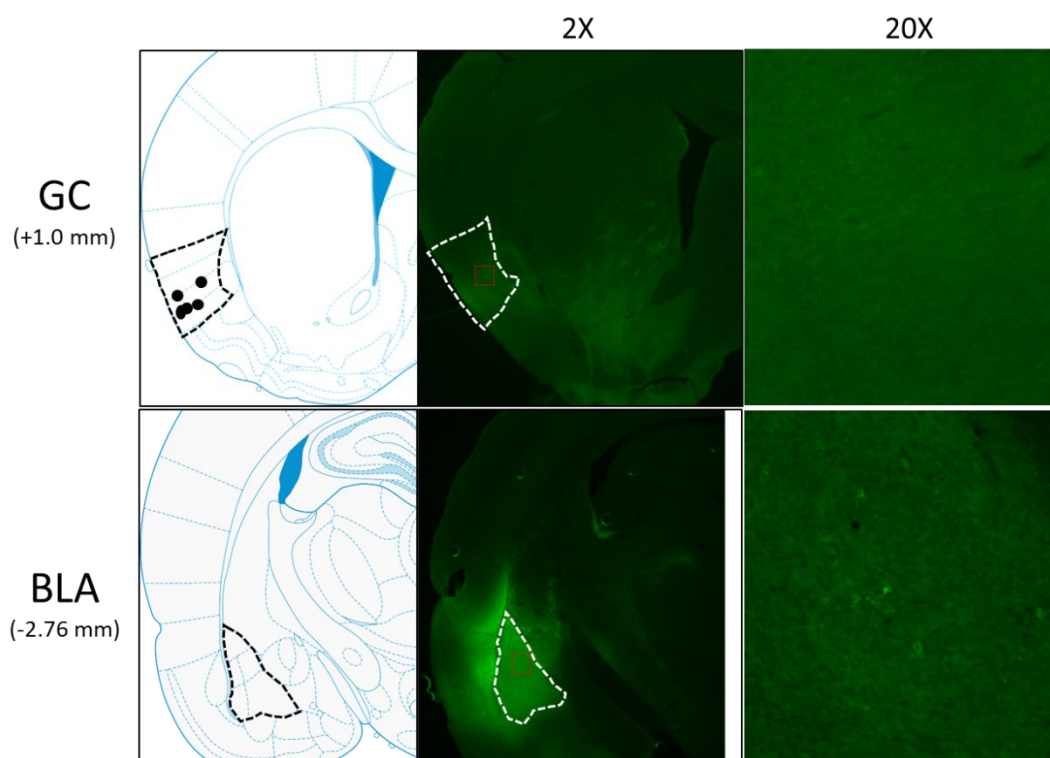

1015

1016

1017 **Fig. 1.** Schematics and sample histology showing ArchT virus infection, visualized by the  
1018 GFP tag, in GC (top panel) and BLA (bottom panel). Brain slices were taken from 1.0 mm  
1019 anterior to bregma for GC and 2.76 mm posterior to Bregma for BLA. Black and white  
1020 dashed lines outline GC and BLA in each panel, and 20X images were the magnification  
1021 of areas within red dashed lines in 2X images. Solid circles in the schematics are final  
1022 locations of the tips of opto-trodes (Schematics were modified from Paxinos and Watson,  
1023 2005 with permission will be requested from Elsevier upon the publication).

1024

## Figure 2.

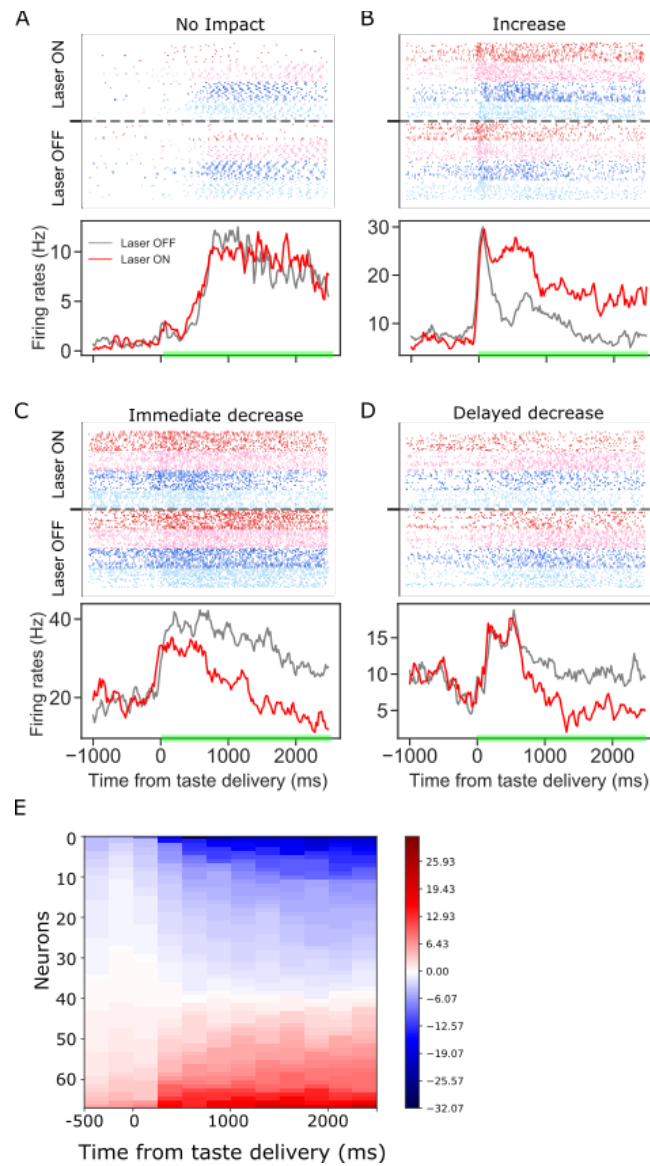

**Fig. 2.** Panels A-D: GC taste responses with raster plots (top) and peri-stimulus histogram (bottom; averaged across all taste trials) during Laser-Off and Laser-On trials. Each panel shows a representative GC neuron whose activity: A) was not modulated, B) increased, C) immediately decreased, or D) had a delayed decrease due to BLA→GCx. E. Mean firing rate differences between control and perturbed trials across 2.5 s (x-axis, divided into ten 250ms-bins) post-taste delivery. Each row in the y-axis is an individual neuron for which activity was significantly altered by BLA→GCx. Blue and red colors indicate the degree to which responses were decreased or increased by the perturbation, respectively. In each case, the perturbation either decreased or increased GC activity, but not both.

**Figure 3**

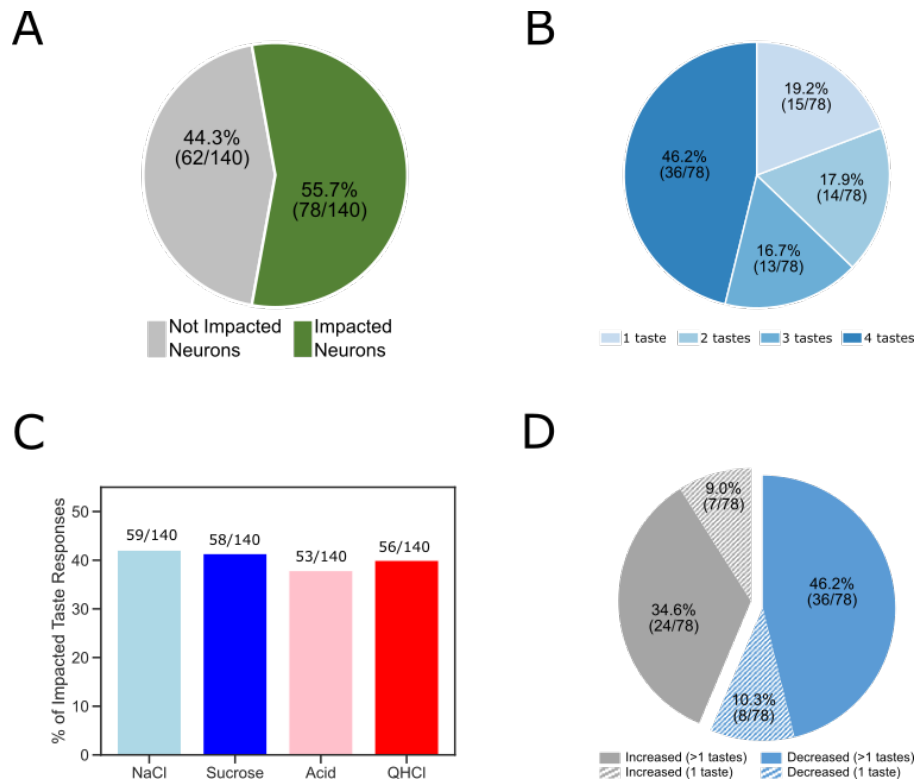

**Fig. 3.** The overall impact of perturbation of BLA→GC axons on the entire GC population. A. Pie chart showing 55.7% (78/140) of recorded GC neurons were affected by laser stimulation. B. The impacted GC neurons with various taste responses being influenced by laser stimulation. For 46.2% of the impacted neurons, responses to all four tastes were changed; 16.7% of the neurons showed changes to three (out of 4) tastes; for 17.9% of the GC neurons changed their responses to 2 tastes. Finally, for the rest of the neurons there was only one taste response altered by perturbation. C. Bar graph showing the number of each individual taste response being altered by BLA→GCx. As revealed, the impact was comparable across tastes: ~40% of each taste response was altered by stimulation. D. Among the impacted neurons, 56.4% (44/78; blue) of them decreased their response rates in reaction to taste delivery while 43.6% (34/48; gray) increased response rates. Noted that in cases in which BLA→GCx impacted >1 taste response (60 [36+24] solid color), the perturbation either consistently decreased (60%; 36/60) or increased (40%; 24/60) firing rates.

## Figure 4

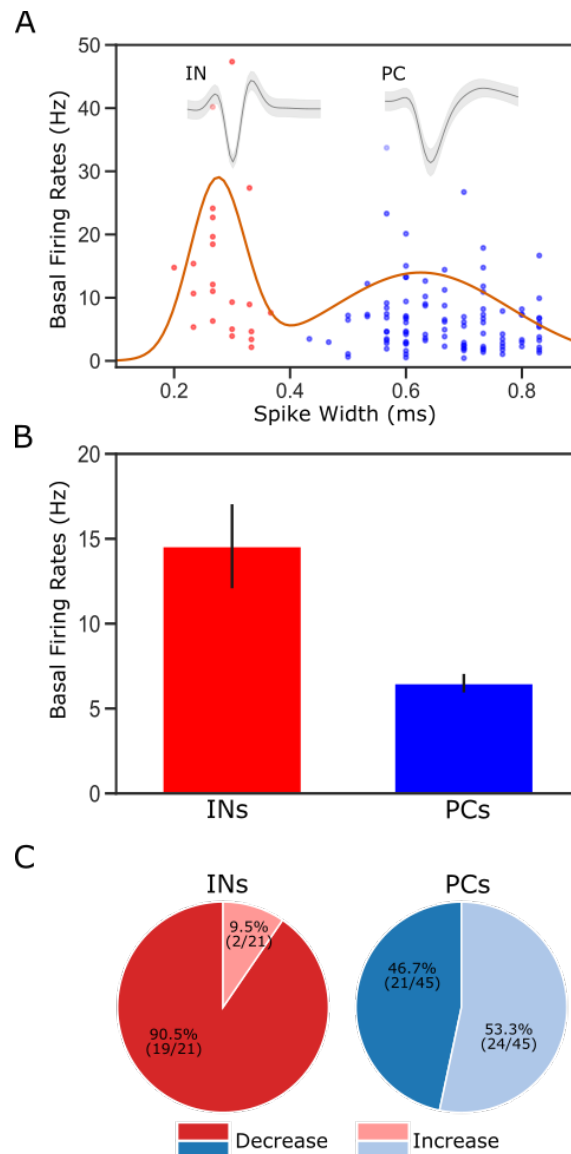

**Fig. 4.** Classification of putative interneurons (INs) and pyramidal cells (PCs). A, Given the radical difference in waveforms between INs and PCs (representative examples of each type shown on the top of the figure), neuronal type assignment was based on the half-spike width (calculated from valley to the post-valley peak); units with width < 0.35 ms are marked as INs (red dots) while those with width > 0.35 ms are classified as PCs (blue dots). A Gaussian fit to the firing rates of the recorded neurons is overlaid with the data points. B, GC single units classified as INs have higher basal firing rates than those classified as PCs. C, The impact of perturbation of BLA→GC axons was different among the two types of GC neurons. While most of the GC INs (90.5%) were suppressed, only 46.7% of PCs showed decreased firing rates following laser stimulation.

**Figure 5**

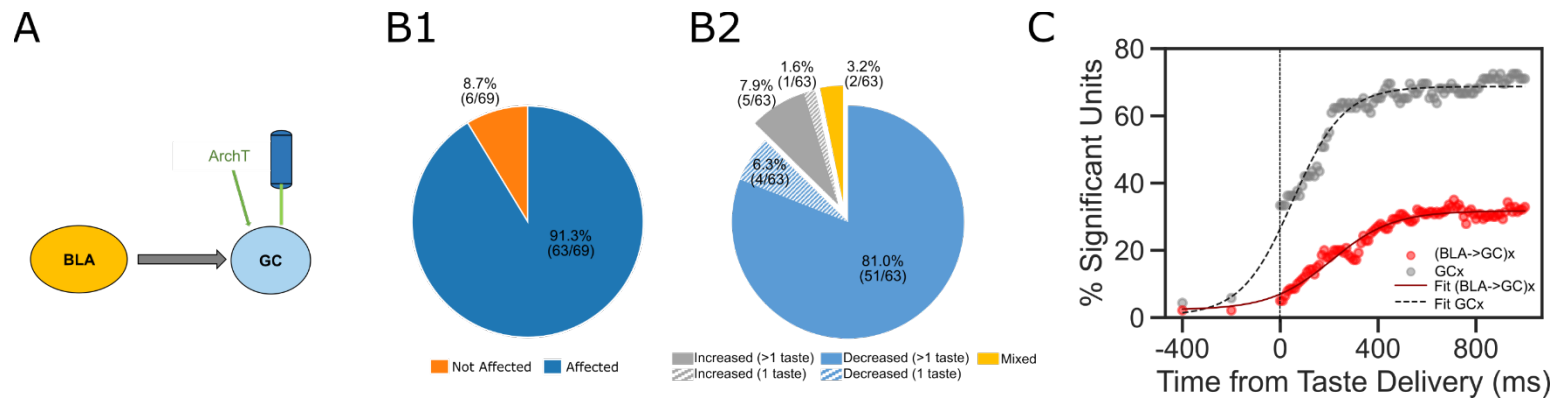

**Fig. 5.** Comparisons between laser perturbation on GC somas and BLA→GC axons. A, GC recording was done ~4 weeks after ArchT AAV virus was infused into GC. B, Pie charts demonstrate that laser stimulation caused firing changes in 91.3% of the recorded GC neurons, among which, 87.3% showed suppressed impact while others were either enhanced or showed mixed impact by the perturbation. Noted that both the percentage of affected neurons and the percentage of decreased units following direct perturbation of GC somas are significantly greater than those with perturbation on BLA→GC axons (Figure 3). C. Percentages of GC neurons affected by perturbation of GC somas (grey dots) or BLA→GC axons (red dots). As indicated by fitted lines (of sigmoid function); The percentages of impacted GC neurons not only started higher immediately following laser stimulation but also rose at a faster rate than that was found with BLA→GCx.

**Figure 6**

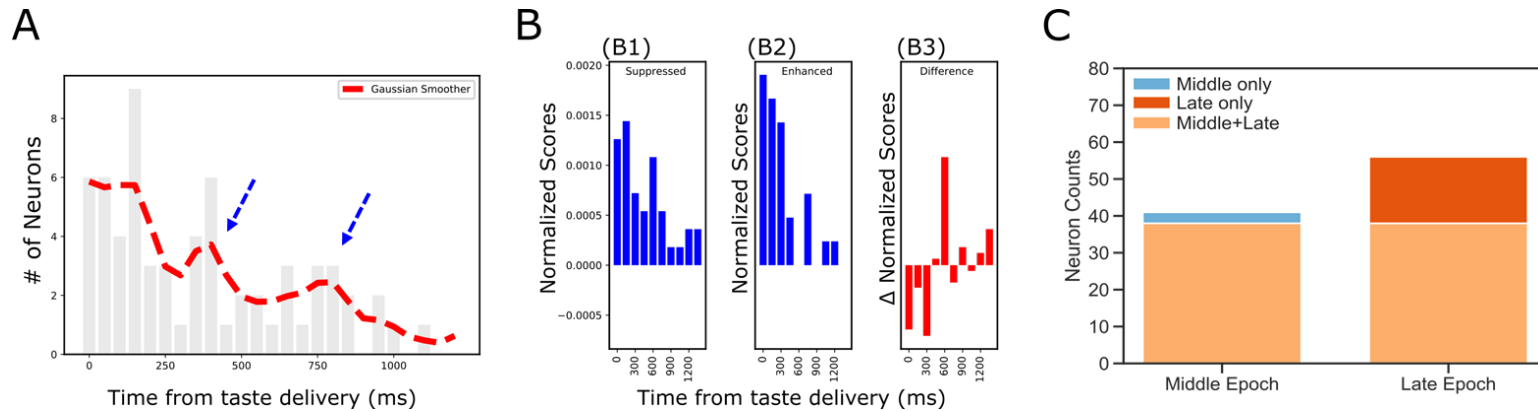

**Fig. 6.** Dynamics revealed in analysis of impact latency and duration. A, Histogram of impact latencies occurring post-taste delivery. Instead of an exponential decay function, the distribution is best fitted with a mixture Gaussian function (red dash line) which found 2 peaks at ~300 ms and ~750 ms, respectively. B, Distribution of impact latency grouped by decreased impact (B1) and increased impact (B2). B3 reveals the difference between decreased and increased impact, demonstrating a clear sign shift in the time bin started at 600 ms; after the shift, decreased impact became more dominant than increased ones. C, Number of laser-impacted GC neurons grouped by whether they showed significant laser impact during the Middle “Identity” epoch (100-600 ms) or the Late “Palatability” epoch (700-1200 ms). As revealed, BLA→GCx rarely only impacted Middle epoch firing (n=3). Instead, most of the affected neurons showed significant impact over the late, palatability epoch with the impact that either started when the Late epoch began (n=15) or started earlier and remained impacted over the Late epoch (n=38).



## Figure 7

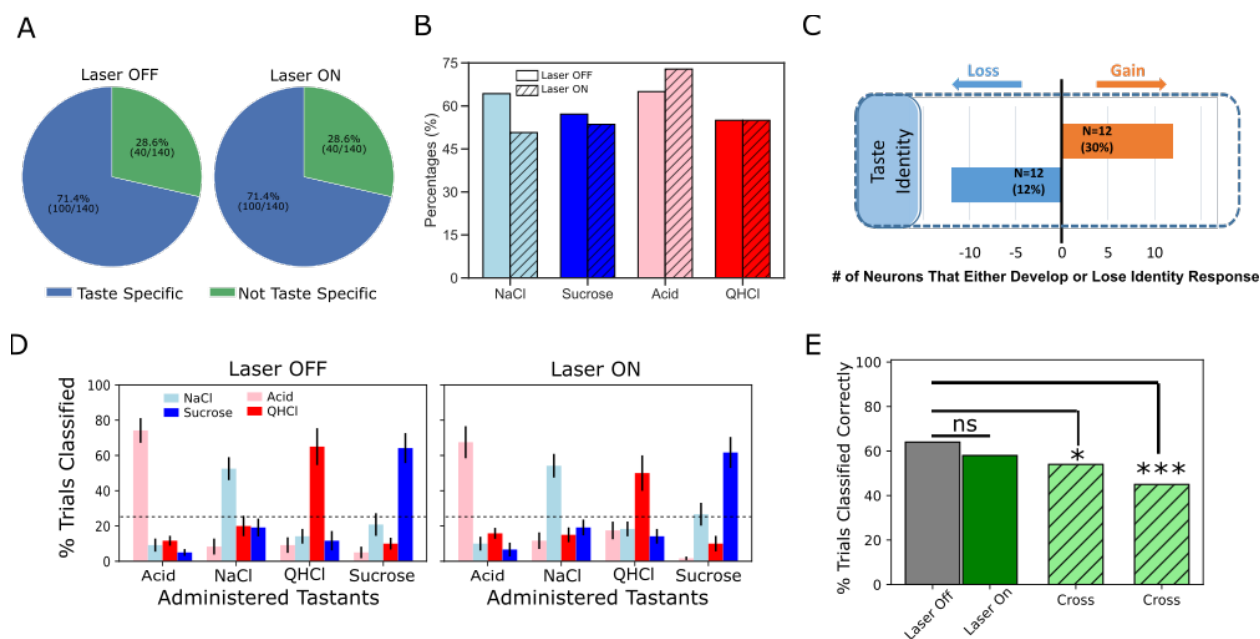

**Fig. 7.** Laser perturbation of BLA→GC axons has little impact on GC taste specificity. A, The numbers of taste-specific neurons (71.4%) in Laser Off and Laser On trials are essentially identical. B, The proportions of neurons responding to each taste (NaCl, Sucrose, Acid, and QHCl) are similar (and statistically non-distinct) for Laser-Off and Laser-On trials. C, A within-neuron analysis reveals that similar numbers of neurons lost taste-specific activity and developed taste-specific activity anew with laser stimulation. D, A classification analysis performed on the entire GC dataset shows that discriminability of taste spiking responses was similar in Laser-Off (left panel) and Laser-On (right panel) trials, with the classifier reliably picking out the administered taste at well above chance levels (dashed lines indicate 25% chance performance). E, The overall percentage of trials in which tastes were correctly identified is similar for Laser-Off and Laser-On trials. When classification was evaluated across laser conditions (i.e., when the classifier was trained on control trials and tested on laser trials or vice versa), the percentage of trials in which the taste was correctly identified dropped significantly (“Full dataset”); the rate of correct identification dropped still further when the analysis was restricted to neurons significantly impacted were included in the analysis (“Impacted by laser”). \* < 0.05, \*\*\* < 0.001 in Chi-squared analyses.

## Figure 8

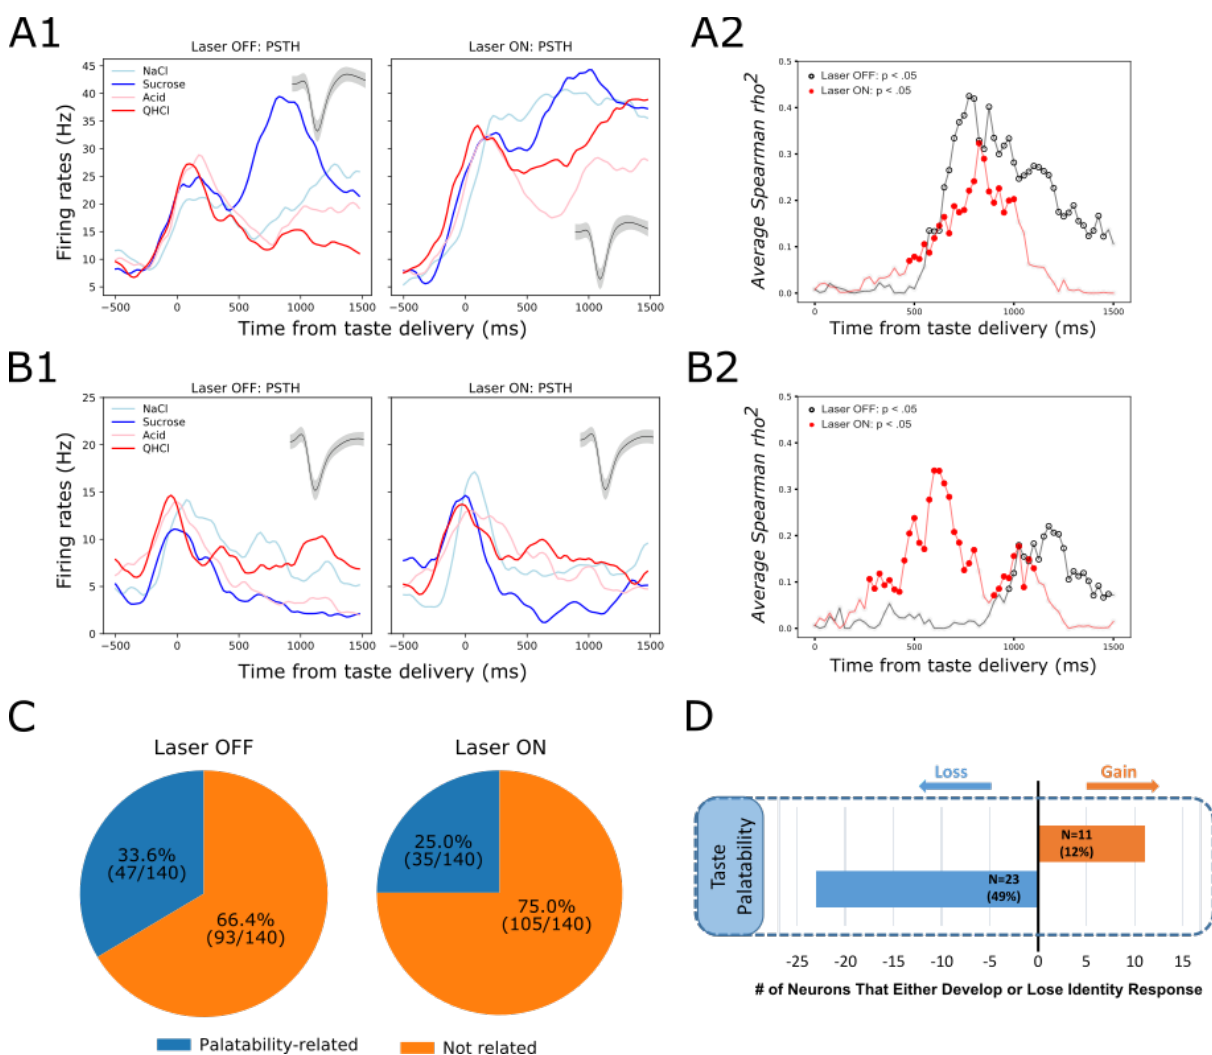

**Fig. 8.** GC palatability information lost following perturbation on BLA→GC axons. A, Representative GC neuron showing decreased palatability-related activity by stimulation. PSTHs of this neuron (Panel A1) were plotted over Laser-Off trials (left panel) and Laser-On trials (right panel). Panel A2 is the moving window analysis of Spearman correlation between firing rates and taste palatability across post-stimulus time. B, Representative GC neuron showing increased (unmasked) palatability-related activity following laser stimulation; PSTHs of the neuron are plotted in Panel B1 and palatability correlation is shown in Panel B2. C, Overall, the number of GC neurons showing palatability activity was significantly decreased by laser stimulation from 33.6% to 25.0%. D, Within-neuron analysis revealed that whereas ~50% of the GC neurons (N=23) that initially showed palatability activity lost the response during perturbation, only 12% of the neurons (N=11) gained palatability responsiveness following stimulation.

**Figure 9**

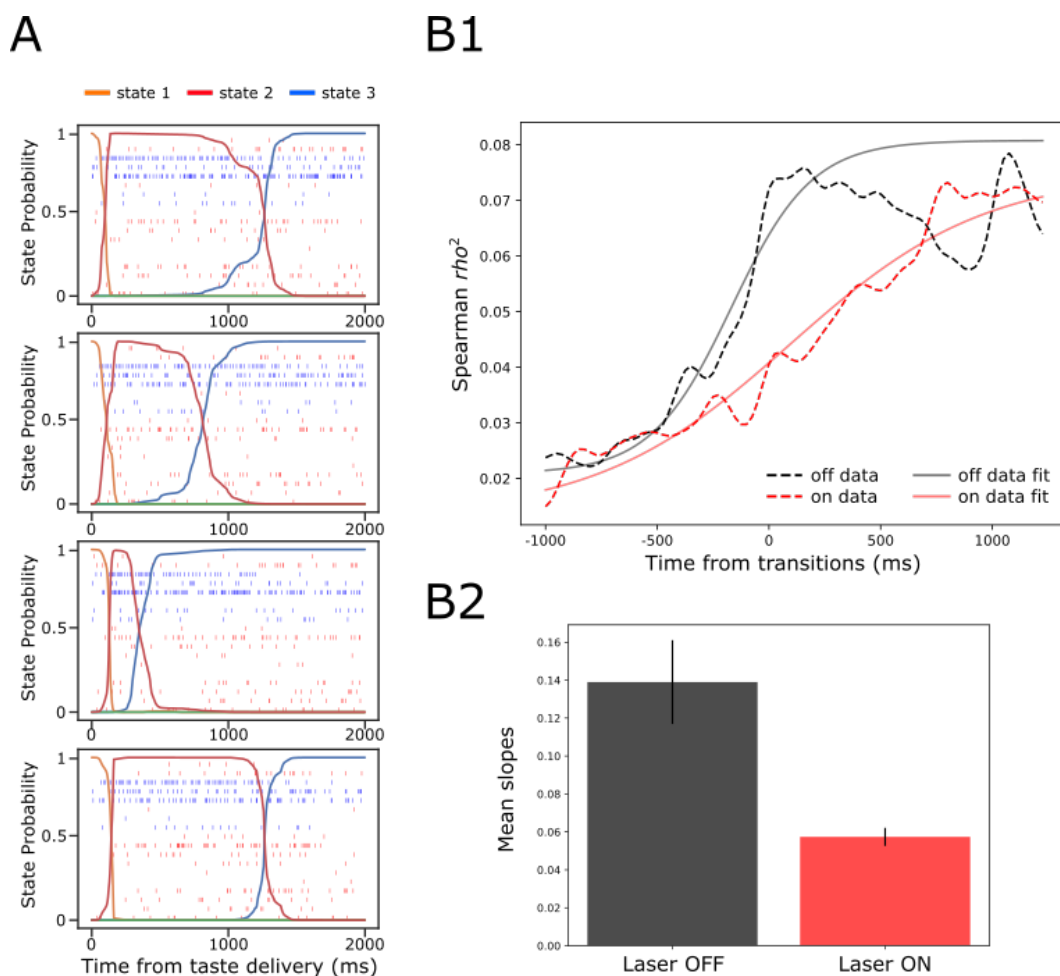

**Fig. 9.** GC ensemble palatability activity was greatly impaired by perturbation on BLA→GC axons. A, Example ensemble responses evoked by NaCl administration characterized using HMM: The colored lines overlain on the ensemble of spike trains (each row representing a single neuron, y-axis) indicate the calculated probability that the ensemble is in that particular state. B1, Solid lines are moving window analysis of palatability correlations between firing rates (calculated from spike trains ranged from 1000 ms before to 1500 ms after the transition time) and taste palatability; dashed lines are sigmoid fits for the raw data. B2, The slopes of the sigmoid fits in B1 (error bars denote 95% Bayesian credible intervals); the development of correlations is significantly shallower on the perturbed (Laser-On) trials than on control (Laser-Off) trials.

## Figure 10

A

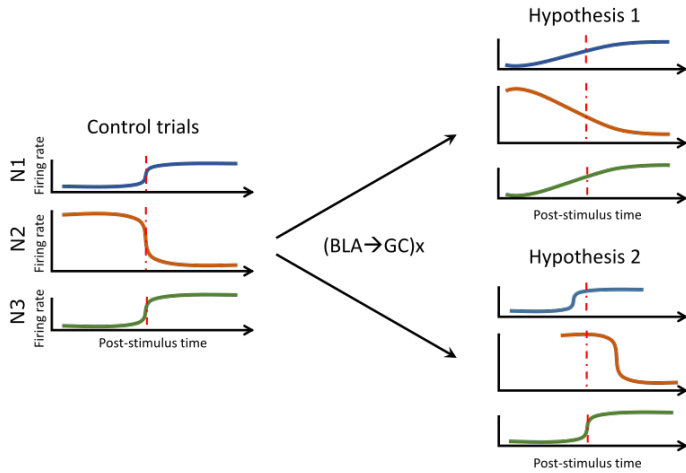

**Fig. 10.** A. Schematics demonstrating two potential mechanisms by which BLA→GCx can decelerate the rise of palatability correlations. Hypothesis 1: laser stimulation causes a general reduction in the sharpness of firing-rate changes for individual neurons; Hypothesis 2: laser stimulation “decoupled” the inter-neuron timing of those changes without altering the firing rate dynamics of each individual neuron. Red dashed line in each subpanel indicates the transition time during taste responses. B. Scatter plot shows the slope changes for each GC neuron (Laser-Off [x-axis] against Laser-On [y-axis]). The red line is the regression fit of the data, and its slope was significantly shallower than the unity line (grey-dashed line with slope as 1, i.e., no impact of laser). C, Mean slopes ( $\pm$  SEM) of GC neurons that were assigned into five groups based on the slopes in the control, Laser-Off, trials. As revealed, BLA→GCx (light blue bars) significantly

B

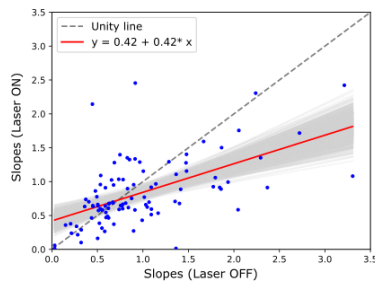

C

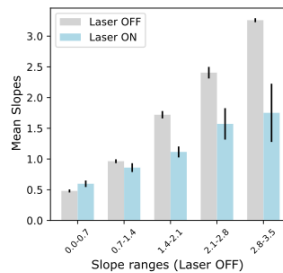

D

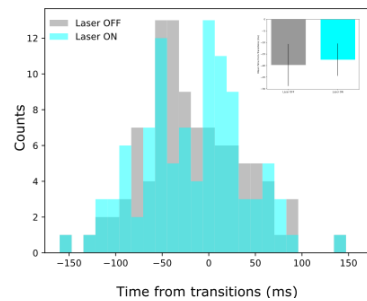

reduced the changes in firing rates (slopes) around the state transition time. D, Histogram of the latencies of when the sharpest slope occurred relative to the transition time across Laser-Off and Laser-On conditions. The mean latency ( $\pm$  SEM) are depicted in the inset, which reveals no significant difference across laser conditions. Accordingly, the reduction in the magnitude of firing changes (i.e., slopes) around the transition time likely accounts for the slowness in palatability correlation ramping up during perturbation on BLA→GC axons.

**Figure 11**

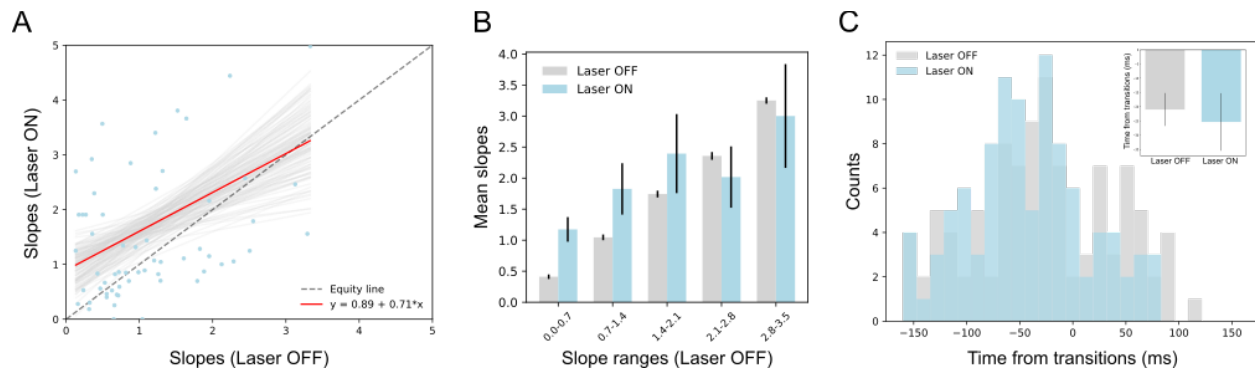

**Fig. 11.** A, Scatter plot shows the slope changes during the transition times into the identity state (a dominant during 100~600ms post-taste delivery) for each GC neuron (Laser-Off [x-axis] against Laser-On [y-axis]). The red line is the regression fit of the data, whose slope is not significantly from the unity line (grey-dashed line with slope as 1, i.e., no impact of laser). B, Mean slopes ( $\pm$  SEM) of GC neurons that were assigned into five subgroups based on the slopes in the control, Laser-Off, trials. Consistent with Panel A, the changes in firing rates (slopes) around the state transition times were comparable between Laser-Off and Laser-On conditions. The seemingly increase in the Laser-On condition for the first two slope ranges (0.0-1.4) is a numerical difference and not supported by statistical significance (see text for more details). C, Histogram of the latencies of when the sharpest slope occurred relative to the transition time across Laser-Off and Laser-On conditions. The mean latencies ( $\pm$  SEM) from each ensemble (the inset) are not significantly different across laser conditions. Thus, BLA $\rightarrow$ GCx has little impact on the state transitions into the identity epoch.
